1 **Redundant and specific roles of EGFR ligands in the ERK activation waves during**  
2 **collective cell migration of MDCK cells**

3  
4 Shuhao Lin<sup>1</sup>, Daiki Hirayama<sup>2</sup>, Gembu Maryu<sup>3</sup>, Kimiya Matsuda<sup>2</sup>, Naoya Hino<sup>2</sup>, Eriko  
5 Deguchi<sup>1</sup>, Kazuhiro Aoki<sup>3,4,5</sup>, Ryo Iwamoto<sup>6</sup>, Kenta Terai<sup>1</sup>, and Michiyuki Matsuda<sup>1,2,7\*</sup>.

6  
7 <sup>1</sup>Department of Pathology and Biology of Diseases, Graduate School of Medicine,  
8 Kyoto University, Sakyo-ku, Kyoto, 606-8501, Japan.

9 <sup>2</sup>Research Center for Dynamic Living Systems, Graduate School of Biostudies, Kyoto  
10 University, Sakyo-ku, Kyoto, 606-8501, Japan.

11 <sup>3</sup>Division of Quantitative Biology, National Institute for Basic Biology, National  
12 Institutes of Natural Sciences, 5-1 Higashiyama, Myodaiji-cho, Okazaki, Aichi, 444-  
13 8787, Japan.

14 <sup>4</sup>Quantitative Biology Research Group, Exploratory Research Center on Life and Living  
15 Systems (ExCELLS), National Institutes of Natural Sciences, 5-1 Higashiyama,  
16 Myodaiji-cho, Okazaki, Aichi 444-8787, Japan.

17 <sup>5</sup>Department of Basic Biology, School of Life Science, SOKENDAI (The Graduate  
18 University for Advanced Studies), 5-1 Higashiyama, Myodaiji-cho, Okazaki, Aichi,  
19 444-8787, Japan.

20 <sup>6</sup>Research Institute for Microbial Diseases, Osaka University, 3-1 Yamadaoka, Suita,  
21 Osaka, 565-0871, Japan.

22 <sup>7</sup>Institute for Integrated Cell-Material Sciences, Kyoto University, Sakyo-ku, Kyoto,  
23 606-8501, Japan.

24  
25  
26  
27  
28  
29  
30  
31 \*Corresponding author. Department of Pathology and Biology of Diseases, Graduate  
32 School of Medicine, Kyoto University, Sakyo-ku, Kyoto, 606-8501, Japan.

33 Email: matsuda.michiyuki.2c@kyoto-u.ac.jp

34

## 35 **Abstract**

36 Epidermal growth factor receptor (EGFR) plays a pivotal role in collective cell  
37 migration by mediating cell-to-cell propagation of extracellular signal-regulated kinase  
38 (ERK) activation. Here, we aimed to determine which EGFR ligands mediate the ERK  
39 activation waves by gene knockout. Four of the seven known EGFR ligands are  
40 expressed in MDCK cells. We found that epidermal growth factor (EGF)-deficient cells  
41 exhibited lower basal ERK activity than the cells deficient in heparin-binding EGF  
42 (HBEGF), transforming growth factor alpha (TGF $\alpha$ ) or epiregulin (EREG), but all cell  
43 lines deficient in a single EGFR ligand retained the ERK activation waves. Therefore,  
44 we knocked out the EGFR ligand genes in decreasing order of expression. ERK  
45 activation waves were markedly suppressed, albeit incompletely, only when all four  
46 EGFR ligands were knocked-out. Re-expression of the EGFR ligands revealed that all  
47 but HBEGF could restore the ERK activation waves. Aiming at complete elimination of  
48 the ERK activation waves, we further attempted to knockout *Nrg1*, a ligand for ErbB3  
49 and ErbB4, and found that *Nrg1* deficiency induced growth arrest in the absence of all  
50 four EGFR ligand genes expressed in MDCK cells. Collectively, these results showed  
51 that EGFR ligands exhibit remarkable redundancy in the propagation of ERK activation  
52 waves during collective cell migration.

53

## 54 **Introduction**

55 Collective cell migration in mammalian tissues is a well-orchestrated cell movement  
56 underlying fundamental biological processes (Friedl and Gilmour, 2009; Mayor and  
57 Etienne-Manneville, 2016). The EGFR (epidermal growth factor receptor)-ERK  
58 (extracellular signal regulated kinase) signaling cascade plays a pivotal role in the  
59 collective cell migration of various cell types (Friedl and Gilmour, 2009; Yarden and  
60 Sliwkowski, 2001). During collective cell migration of epidermal cells, ERK activation  
61 propagates as multiple waves from the leader cells to the follower cells in an EGFR-  
62 dependent manner (Aoki et al., 2017; Boocock et al., 2021; Hino et al., 2020; Hiratsuka  
63 et al., 2015). Similar propagation of ERK activation waves has been visualized in  
64 developing *Drosophila* tracheal placode (Ogura et al., 2018), regenerating zebrafish  
65 scales (De Simone et al., 2021) and developing mouse cochlear ducts (Ishii et al., 2021),  
66 suggesting that growth factor-mediated ERK activation waves may generally underlie  
67 cell migration in various tissues.

68 EGFR is bound to and activated by a family of ligands that include epidermal  
69 growth factor (EGF), transforming growth factor alpha (TGF $\alpha$ ), heparin-binding EGF-  
70 like growth factor (HBEGF), amphiregulin, betacellulin, epiregulin (EREG), and epigen

71 (Harris et al., 2003). Extensive research has clarified the difference among the EGFR  
72 ligands with respect to binding affinity to four ErbB-family receptors including  
73 EGFR/ErbB1, sensitivity to proteases, subcellular localization, bioactivity to promote  
74 cell growth, and migration (Singh et al., 2016; Wilson et al., 2009). However, there still  
75 remain many questions to be answered about the roles played by the endogenous EGFR  
76 ligands, because much of the current knowledge is based on exogenous bolus  
77 application of EGFR ligands to tissue culture cells. Meanwhile, knockout mice deficient  
78 in each of the seven EGFR ligand genes are viable and fertile (Nanba et al., 2013;  
79 Schneider et al., 2008), suggesting functional redundancy among the EGFR ligands  
80 (Riese and Cullum, 2014; Singh and Coffey, 2014; Taylor et al., 2014; Zeng and Harris,  
81 2014). Therefore, abrogation of multiple EGFR ligands is essential to clearly  
82 demonstrate the activity of the endogenous EGFR ligands.

83 Here, to determine which EGFR ligand mediates the propagation of the ERK  
84 activation waves during collective cell migration of MDCK cells, we knocked-out all  
85 four EGFR ligands expressed in MDCK cells, EGF, TGF $\alpha$ , HBEGF and EREG. We  
86 found that propagation of the ERK activation waves was markedly suppressed only  
87 when all four EGFR ligands were knocked-out. Re-expression of each EGFR ligand  
88 showed that EGF, TGF $\alpha$  and EREG, but not HBEGF, can restore the ERK activation  
89 waves.

90

## 91 **Results**

92

### 93 **A new FRET biosensor for ERK without cross-reactivity to Cdk1**

94 In previous studies (Aoki et al., 2017; Aoki et al., 2013; Hino et al., 2020), we used the  
95 FRET-based EKAREV biosensor for the detection of the ERK activation waves.  
96 However, EKAREV responds not only to ERK, but also to Cdk1, showing increases in  
97 FRET/CFP signal during mitosis even in the presence of an MEK inhibitor. To  
98 overcome this flaw, we developed a new ERK biosensor named EKARrEV by replacing  
99 the substrate peptide derived from Cdc25c with that from RSK1 (Fig. 1A). In MDCK  
100 cells expressing either EKAREV-NLS (with a nuclear localization signal) or EKARrEV-  
101 NLS, the FRET/CFP ratio was increased by EGF and decreased by the MEK inhibitor  
102 trametinib (Fig. 1B and C). In EKAREV-NLS-expressing cells, but not in EKARrEV-  
103 NLS-expressing cells, the FRET/CFP ratio increased immediately before mitosis (Fig.  
104 1D). Although EKARrEV-NLS exhibited a smaller dynamic range and higher basal  
105 FRET/CFP ratio than the prototype EKAREV-NLS, we adopted EKARrEV-NLS  
106 because the increase in the FRET/CFP ratio during mitosis hampers automatic image

107 analysis of ERK activation waves. It should be noted that Ponsioen et al. also recently  
108 reported another EKAREV-derived biosensor by modifying the substrate peptide to  
109 eliminate the cross-reactivity to Cdk1 (Ponsioen et al., 2021).

110

### 111 **Dependency on EGF for the mean ERK activity in serum-starved MDCK cells**

112 Among the 7 known EGFR ligands, EGF, HBEGF, TGF $\alpha$ , and EREG were detected by  
113 RNA-Seq analysis of MDCK cells (Fig. S1) (Shukla et al., 2015). The expression of  
114 amphiregulin is marginal; therefore, we did not further pursue its role. To examine the  
115 roles of these EGFR ligands in the propagation of ERK activation waves, we employed  
116 CRISPR/Cas9-mediated knockout of each EGFR ligand gene (Fig. S2A). The resulting  
117 cell lines with knockout of a single EGFR ligand were named MDCK-dEGF, MDCK-  
118 dHBEGF, MDCK-dTGF $\alpha$ , and MDCK-dEREG, or simply dEGF, dHBEGF, dTGF $\alpha$ ,  
119 and dEREG hereinafter. Because none of them exhibited a detectable decrease in the  
120 ERK activation waves, we knocked out the EGFR ligands sequentially from two  
121 abundantly expressed genes, *Egf* and *Hbegf*. Because the ERK activation waves were  
122 clearly visible in the double knockout cells, which we named DKO, *Tgfa* was further  
123 knocked out to obtain triple knockout cells, TKO, and then *Ereg* was knocked out to  
124 obtain quadruple knockout cells, QKO. After finding marked suppression of the ERK  
125 activation waves in QKO, all four genes were knocked out simultaneously to obtain an  
126 additional clone deficient from the four EGFR ligand genes, designated as 4KO. *Egfr*  
127 was also knocked-out for comparison, generating the dEGFR cell line (Fig. S2B). After  
128 single cell cloning, frame-shift mutations of both alleles were confirmed by genome  
129 sequencing (Fig. S2C).

130 We first examined the ERK activity using population-based methods. The mean  
131 FRET efficiency of the biosensor was determined for each cell line by fluorescence  
132 lifetime microscopy (Fig. 1E and F). Cells were also subjected to immunoblotting with  
133 anti-phospho-ERK antibody (Fig. 1G). In both experiments, cell lines deficient from  
134 *Egf*, dEGF, DKO, TKO, QKO, and 4KO exhibited lower ERK activity than the wild  
135 type (WT) cells. The level of ERK activity in these *Egf*-deficient cell lines was  
136 comparable to that in dEGFR cells, indicating that EGF is the principal endogenous  
137 EGFR ligand maintaining the basal EGFR activity in serum-starved MDCK cells. Of  
138 note, EKARrEV reflects the balance between ERK activity and phosphatase activity,  
139 whereas the anti-phospho-ERK antibody detects the phosphorylation of the catalytic  
140 loop of ERK. The discrepancy in the ERK activity of dEGFR cells between  
141 fluorescence lifetime imaging microscopy and immunoblotting may arise from this  
142 difference.

143

144 **Redundant roles of EGFR ligands in the propagation of ERK activation waves**  
145 **during collective cell migration as revealed by single cell analysis**

146 For the analysis of collective cell migration, MDCK cells expressing EKARrEV-NLS  
147 were seeded one day before imaging within a culture-insert. After the removal of the  
148 culture-insert, cells were imaged in serum-free medium for more than 12 hours (Fig. 2A  
149 and Video 1). In this study, most experiments, unless noted otherwise, were performed  
150 in the absence of serum to exclude the effect of serum-derived growth factors. To  
151 evaluate the migration speed, cells that were located less than 100  $\mu\text{m}$  from the leading  
152 edge at the time of confinement release were classified as the leader and submarginal  
153 cells (Fig. 2B). We analyzed these cells together because the leader cells are often  
154 replaced by the following submarginal cells during long-term imaging. After single cell  
155 tracking analysis, the displacement of the leader and submarginal cells before and 12 h  
156 after the start of collective cell migration was defined as the cell migration distance. The  
157 impairment of migration was clear when the two most abundant EGFR ligands, EGF  
158 and HBEGF, were absent, suggesting that the total amount of EGFR ligands may be the  
159 primary determinant for the migration of the leader and submarginal cells.

160 In WT cells, clear ERK activation waves were propagated from the leader cells to  
161 the follower cells (Video 1). Similarly, clear ERK activation waves were observed in  
162 single knockout cells, DKO, and even TKO cells. Only when all four EGFR ligand  
163 genes were knocked out in QKO and 4KO were the ERK activation waves markedly  
164 suppressed. To quantitatively understand the contribution of each EGFR ligand to the  
165 propagation of the ERK activation waves, we employed single cell-based analysis of the  
166 follower cells (Fig. 2C). After sine curve fitting of the time course of the FRET/CFP  
167 ratio in each cell (Hiratsuka et al., 2015), three parameters—basal ERK activity,  
168 amplitude, and duration—were obtained to evaluate the effect of EGFR ligand  
169 deficiency. Basal ERK activity was decreased in the *Egf*-deficient cell lines, dEGF,  
170 DKO, TKO, QKO and 4KO (Fig. 2D), as observed in the population-based analysis  
171 (Fig. 1E–G). The decrease of amplitude was obvious when all four EGFR ligand genes  
172 were knocked out (Fig. 2E). Negligible changes of duration period were observed in all  
173 cell lines, although the variance was markedly larger in QKO, 4KO, and dEGFR,  
174 probably because of the low amplitude of each pulse (Fig. 2F). These results indicated  
175 that EGF is the primary EGFR ligand to maintain the basal ERK activity, whereas all  
176 EGFR ligands may contribute to the propagation of ERK activation.

177

178 **Redundant roles of EGFR ligands in the propagation of ERK activation waves as**  
179 **revealed by heat map analysis**

180 We then employed population-based analysis of ERK activation waves. First, a heat  
181 map of the ERK activity was obtained by interpolation of the FRET/CFP images (Fig.  
182 3A). The directedness and the number of waves were analyzed by particle image  
183 velocimetry (PIV) and kymograph, respectively. We sometimes observed waves  
184 propagating in random directions, particularly at the area remote from the leader cells.  
185 PIV analysis showed that the directionality of ERK activation waves from the leader  
186 cells to the follower cells was markedly perturbed in QKO, 4KO and dEGFR cells (Fig.  
187 3B). Similarly, the number of ERK activation waves was markedly decreased in QKO,  
188 4KO, and dEGFR cells (Fig. 3C). Among the cell lines, we did not observe apparent  
189 changes in the speed of the ERK activation waves when they appeared.

190 We previously showed that the ERK activation waves are induced by mechanical  
191 stretch from the leader cells, which retain high ERK activity (Hino et al., 2020).  
192 Therefore, the lack of ERK activation waves in QKO and 4KO cells may be due to the  
193 low ERK activity in the leader cells. To eliminate this possibility, we employed a  
194 rapamycin-activatable (RA) system combined with mSos1, a Ras guanine nucleotide  
195 exchange factor (Aoki et al., 2017). MDCK cells carrying RA-mSos1 were seeded next  
196 to MDCK WT or 4KO cells (Fig. 3D). Upon rapamycin treatment, ERK was activated  
197 in the RA-SOS cells, followed by the emergence of ERK activation waves in WT cells,  
198 but not in 4KO cells, at the interface (Fig. 3E, 3F and Video 2), indicating that ERK  
199 activation in RA-mSOS1 cells cannot be transmitted to the neighboring 4KO cells. In  
200 short, none of the knockouts of single EGFR ligands affected either the collective cell  
201 migration or the propagation of ERK activation waves, which were markedly impaired  
202 in cell lines deficient in all four EGFR ligand genes.

203

204 **Restoration of ERK activation waves by re-expression of the EGFR ligands**

205 Do all EGFR ligands contribute to the ERK activation waves? To answer this question,  
206 we re-expressed each of the four EGFR ligands in 4KO cells and performed a  
207 confinement release assay (Fig. 4A and Video 3). The results showed that all EGFR  
208 ligands accelerated the migration of the leader and submarginal cells (Fig. 4B), but none  
209 of them increased the basal ERK activity to the level in the WT cells (Fig. 4C).  
210 Interestingly, except HBEGF, all EGFR ligands restored the ERK activation waves, as  
211 evidenced by the increase in the number, amplitude and directionality of waves from the  
212 leader cells (Fig. 4D–F). We also quantified the area of ERK activation waves by using  
213 binarized interpolated FRET/CFP ratio images (Fig. 4G). Again, except HBEGF, all



214 EGFR ligands were able to restore the area of ERK activation waves.

215 Next, we examined whether bath application of EGFR ligands could also restore  
216 the ERK activation waves. EGFR ligands at the same concentration,  $10 \text{ ng mL}^{-1}$  ( $\sim 2$   
217 nM), were added to 4KO cell lines after the removal of the confinement (Fig. S3A and  
218 Video 4). All EGFR ligands induced transient ERK activation and promoted leader cell  
219 migration (Fig. S3B and C). Nevertheless, none were able to induce ERK activation  
220 waves from the leader cells, indicating that only the endogenous EGFR ligands can  
221 generate ERK activation waves from the leader cells. Notably, the duration of the  
222 transient ERK activation was markedly longer in HBEGF-treated cells than in the cells  
223 treated with EGF,  $\text{TGF}\alpha$ , or EREG (Fig. S3D).

224

### 225 **Growth arrest induced by the knockout of *Nrg1* in the absence of all four EGFR** 226 **ligands**

227 Albeit much less intensely than in WT cells, the ERK activation waves from the leader  
228 cells persisted even in QKO, 4KO, and dEGFR cells (Fig. 2A and Video 1), implying  
229 the involvement of neuregulins (NRGs), the ligands for ErbB3 and ErbB4. Among the  
230 four *Nrg* genes, only the expression of *Nrg1* was detected in MDCK cells (Fig. S1).  
231 Therefore, we attempted to knockout *Nrg1* in 4KO cells with three different sgRNAs  
232 targeted to exon 6 or exon 9 of *Nrg1*. Among 75 individual clones, 33 clones exhibited  
233 heterozygous deletion/insertion, but none showed homozygous knockout, suggesting  
234 that additional knockout of *Nrg1* in 4KO cells induces growth retardation. Therefore,  
235 we expressed *Nrg1* cDNA flanked by the *loxP* sequence before knockout of the  
236 endogenous *Nrg1* gene (Fig. 5A). This procedure successfully generated a clone named  
237 5KO-loxP-NRG1, in which two-base deletion and single-base insertion were found in  
238 the *Nrg1* alleles (Fig. S2C). We further expressed Cre-ERT2 to generate 5KO-loxP-  
239 NRG1-CreERT2 cells and compared the cell growth in the presence and absence of 4-  
240 hydroxytamoxifen. As expected, after the addition of 4-hydroxytamoxifen, 5KO-loxP-  
241 NRG1-CreERT2 cells exhibited cell growth arrest (Fig. 5B), demonstrating the essential  
242 role of *Nrg1* in the growth of 4KO cells and indispensable role of the autocrine  
243 activation of the ErbB-family receptors in the growth of MDCK cells.

244

### 245 **Discussion**

246 To examine the contribution of each EGFR ligand to the ERK activation waves, we first  
247 started to knockout the EGFR ligand genes from abundantly expressed *Egf* and *Hbegf*,  
248 followed by *Tgfa* and *Ereg*. Against our expectation, we found that the ERK activation  
249 waves from the leader cells were markedly inhibited only when all four EGFR ligands

250 were knocked-out in QKO (Fig. 2E, Fig. 3C). A potential problem of our gene-knockout  
251 approach is that by this sequential knockout of the EGFR ligand genes, off-target  
252 mutations may accumulate. Therefore, we knocked-out *Hbegf*, *Egf*, *Tgfa* and *Ereg*  
253 simultaneously to obtain 4KO cells. By using these two independent clones, we  
254 minimized the potential effect of off-target mutation(s).

255 We previously reported that a disintegrin and metalloprotease 17 (ADAM17), also  
256 known as TACE, plays a critical role in the propagation of ERK activation waves in  
257 MDCK cells (Aoki et al., 2017; Hino et al., 2020). All pro-EGFR ligands except EGF  
258 are cleaved by ADAM17 to be soluble EGFR ligands (Sunnarborg et al., 2002). Then,  
259 why does EGF also restore the ERK activation waves? The ERK activation waves  
260 persist even in 4KO and QKO cells, suggesting the involvement of ErbB3 and ErbB4.  
261 EGF is the principal EGFR ligand that maintains basal ERK activity (Fig. 2), which is  
262 probably required for efficient ADAM17 activation (Fan and Derynck, 1999).  
263 Therefore, by restoring EGF-mediated ERK activation, NRG1, a substrate of ADAM17,  
264 may efficiently contribute to the ERK activation propagation in an ErbB3 and ErbB4-  
265 dependent manner. Another related unanswered question is that of why HBEGF failed  
266 to restore the ERK activation waves. Since the cell migration was accelerated by the  
267 HBEGF expression to the level of other EGFR ligands (Fig. 4B), functional HBEGF  
268 was expressed in 4KO-HBEGF cells. Because the auto-regulatory role of the heparin-  
269 binding domain of HBEGF may prevent proteolytic release in MDCK cells (Prince et  
270 al., 2010; Takazaki et al., 2004), ADAM17 activation caused by ERK activation waves  
271 may not be sufficient for the cleavage of HBEGF in MDCK cells. Alternatively, the  
272 prolonged ERK activation by HBEGF, for about 2 hours (Fig. S3D), may render  
273 HBEGF inappropriate for the propagation of the ERK activation waves, because  
274 duration of ERK activation is approximately a half hour both in MDCK cells (Fig. 2F)  
275 and in the mouse epidermis (Hiratsuka et al., 2015). Recently, in MCF10A human  
276 mammary epithelial cells, amphiregulin, expressed only at a marginal level in MDCK  
277 cells, was shown to mediate ERK activation from oncogene-expressing cells to  
278 neighboring normal cells (Aikin et al., 2020). Therefore, the dependency to each EGFR  
279 ligand and the redundancy appears cell type-specific.

280 The 4KO and QKO cells will provide a versatile platform to highlight the  
281 differences among EGFR ligands in a physiological context. Previously, extensive  
282 characterization of EGFR ligands has been conducted by bath application to tissue  
283 culture cells. There are at least two serious problems in this approach. First, bath  
284 application of EGFR ligands may not evoke the physiological phenotypes by autocrine  
285 stimulation. In fact, autocrine stimulation by EGFR ligands has been reported to



286 promote greater cell migration of mammary epithelial cells compared to bath  
287 application (Joslin et al., 2007). In the present study, we also found that the ERK  
288 activation waves were restored by re-expression of EGFR ligands (Fig. 4A), but not by  
289 the bath application of these EGFR ligands (Fig. S3A). Second, the specific activity of  
290 each of the EGFR ligands used in previous studies might be significantly different. In  
291 one study using normal human epidermal keratinocytes, 2 nM EREG induced ERK  
292 phosphorylation more strongly than 10 nM EGF (Draper et al., 2003), whereas in  
293 another study using MCF-7 mammary cancer cells, 10  $\mu$ M EREG and 16 nM EGF  
294 induced ERK phosphorylation to a similar level (Freed et al., 2017). In the present  
295 study, 10 ng mL<sup>-1</sup> (~ 2 nM) of EREG and EGF activated ERK to a similar level (Fig.  
296 S3B and Video 4). Although the cells used in each of these studies are different, these  
297 observations imply that the specific activity of EGFR ligands might be markedly  
298 different in each study. These potential flaws of bath application of EGFR ligands can  
299 be overcome by the re-expression of EGFR ligands in 4KO and QKO cells.

300 In conclusion, our results demonstrate that there is functional redundancy of EGFR  
301 ligands in the propagation of ERK activation waves during collective cell migration of  
302 MDCK cells. MDCK cells deficient in all EGFR ligands will provide a platform to  
303 examine the physiological function of each EGFR ligand.

304

## 305 **Materials and methods**

### 306 **Cells, reagents, antibodies, plasmids, and primers**

307 Reagents, antibodies, plasmids, and primers are described in the supplementary table  
308 and note.

309

### 310 **Cell culture**

311 MDCK cells were from the RIKEN BioResource Center (no. RCB0995). Lenti-X 293T  
312 cells were purchased from Clontech (no. 632180; Mountain View, CA). These cells  
313 were maintained in DMEM (no. 044-29765; Wako, Osaka, Japan) supplemented with  
314 10% FBS (no.172012-500ML; Sigma-Aldrich, St. Louis, MO), 100 unit mL<sup>-1</sup> penicillin,  
315 and 100 mg mL<sup>-1</sup> streptomycin (no. 26253-84; Nacalai Tesque, Kyoto, Japan) in a 5%  
316 CO<sub>2</sub> humidified incubator at 37°C.

317

### 318 **cDNA cloning of dog EGFR ligands**

319 Total RNA was isolated from MDCK cells using an RNeasy Mini Kit (no. 74104;  
320 Qiagen, Hilden, Germany) according to the manufacturer's instructions. cDNA was  
321 reverse transcribed with a PrimeScript II 1st strand cDNA Synthesis Kit (no. 6210A;  
322 Takara Bio, Kyoto, Japan). Based on the information at RefSeq  
323 (<http://www.ncbi.nlm.nih.gov/RefSeq>), pairs of PCR primers specific to canine *Egf*,  
324 *Hbegf*, and *Ereg* were designed with an automated method utilizing Primer3  
325 (<https://primer3.org/>) as listed in the supplementary table and note. The targeted ORF  
326 sequence was amplified by using KOD One PCR Master Mix (no. KMM-101; Toyobo,  
327 Osaka, Japan). The cDNA sequences were determined at the DNA Sequencing Facility  
328 of the Medical Research Support Center, Kyoto University. The cDNAs of canine *Tgfa*  
329 and *Nrg1* were synthesized by GeneArt (Thermo Fisher Scientific, Waltham, MA). The  
330 cDNA sequences of the cloned growth factors are shown in the supplementary table and  
331 note.

332

### 333 **Expression plasmids**

334 The cDNAs of EGFR ligands were inserted into pPB-derived vectors (Yusa et al.,  
335 2009). CreERT2 cDNA (Matsuda and Cepko, 2007) was subcloned into pT2A-derived  
336 vector (Sumiyama et al., 2010) to generate pT2Aneo-CreERT2. For rapamycin-  
337 inducible activation of Ras, cDNA of Lyn-targeted FRB (LDR) and cDNA of mRFP-  
338 FKBP-mSos1-linkercat (Aoki et al., 2011) were subcloned into pPBpuro and pT2Aneo  
339 vector, respectively.

340

### 341 **CRISPR/Cas9-mediated KO cell lines**

342 For CRISPR/Cas9-mediated single or multiple knockouts of genes encoding EGFR  
343 ligands or EGFR, single guide RNAs (sgRNA) targeting the exons were designed using  
344 CRISPRdirect (Naito et al., 2015). Oligo DNAs for the sgRNA were cloned into the  
345 lentiCRISPRv2 (Addgene Plasmid: no. 52961) vector or pX459 (Addgene Plasmid: no.  
346 62988) vector. The expression plasmids for sgRNA and Cas9 were introduced into  
347 MDCK cells by lentiviral infection or electroporation. For lentivirus production,  
348 lentiCRISPRv2-derived expression plasmid, psPAX2 (Addgene Plasmid: no. 12260),  
349 and pCMV-VSV-G-RSV-Rev were co-transfected into Lenti-X 293T cells using  
350 polyethylenimine (no. 24765-1, Polyscience Inc., Warrington, PA). The infected cells  
351 were selected with media containing the following antibiotics, depending on the drug  
352 resistance genes carried by lentiCRISPRv2-derived plasmids; 100  $\mu\text{g mL}^{-1}$  zeocin (no.  
353 11006-33-0, InvivoGen, San Diego, U.S.A), 2.0  $\mu\text{g mL}^{-1}$  puromycin (no. P-8833,  
354 Sigma-Aldrich, St. Louis, MO), 200  $\mu\text{g mL}^{-1}$  hygromycin (no. 31282-04-9, Wako,  
355 Tokyo, Japan) and/or 800  $\mu\text{g mL}^{-1}$  neomycin (no. 16512-52, Nacalai Tesque, Kyoto,  
356 Japan). For electroporation, pX459-derived expression plasmids were transfected into  
357 MDCK cells by an Amaxa Nucleofector II (Lonza, Basel, Switzerland). The transfected  
358 cells were selected with 2.0  $\mu\text{g mL}^{-1}$  puromycin. After single cell cloning, genomic  
359 DNAs were isolated with SimplePrep reagent (no. 9180, TAKARA bio, Kyoto, Japan)  
360 according to the manufacturer's instruction. PCR was performed using KOD FX neo  
361 (no. KFX-201 TOYOBO, Osaka, Japan) for amplification with designed primers,  
362 followed by DNA sequencing.

363

### 364 **Expression of FRET biosensors**

365 cDNAs of EKARrEV-NLS were stably expressed either by lentivirus-mediated  
366 induction or transposon-mediated gene transfer. The pPB-derived vectors were co-  
367 transfected with pCMV-mPBase (neo-) (Yusa et al., 2009) at a ratio of 4:1 into MDCK  
368 cells using the Amaxa nucleofector system. Similarly, pT2A-EKAREV-NLS and  
369 pCAGGS-T2TP (Kawakami et al., 2004) were co-transfected into MDCK cells by  
370 electroporation. The established cell lines are summarized in the supplementary table  
371 and note.

372

### 373 **Time-lapse imaging by wide-field fluorescence microscopy**

374 Fluorescence images were acquired essentially as described previously (Aoki and  
375 Matsuda, 2009). Briefly, cells cultured on glass-base dishes were observed under an  
376 IX83 inverted microscope (Olympus, Tokyo, Japan) equipped with a UPlanFL-PH

377 10x/0.3 (Olympus), a UPlanSApo 20x/0.75 (Olympus), or a UPlanSApo 40x/0.95  
378 objective lens (Olympus), a DOC CAM-HR CCD camera (Molecular Devices,  
379 Sunnyvale, CA), a Spectra-X0 light engine (Lumencor Inc., Beaverton, OR), an IX3-  
380 ZDC laser-based autofocus system (Olympus), an electric XY stage (Sigma Koki,  
381 Tokyo, Japan) and a stage top incubator (Tokai Hit, Fujinomiya, Japan). The filters and  
382 dichromatic mirrors used for time-lapse imaging were as follows: for FRET imaging, a  
383 438/24 excitation filter incorporated in the Spectra-X light engine, a FF458-Di02-25x36  
384 dichromatic mirror (Semrock, Rochester, NY), and FF01-483/32-25 and FF01-542/27-  
385 25 emission filters (Semrock) for CFP and FRET, respectively.

386

### 387 **Confinement release assay**

388 The confinement release assay was performed as described previously (Hino et al.,  
389 2020). To observe collective cell migration of MDCK cells, a Culture-Insert 2 Well (no.  
390 81176; ibidi, Martinsried, Germany) was placed on a 35 mm glass-base dish (no. 3911-  
391 035; IWAKI, Shizuoka, Japan) coated with 0.3 mg mL<sup>-1</sup> type I collagen (Nitta Gelatin,  
392 Osaka, Japan). MDCK cells ( $3.5 \times 10^4$ ) were then seeded in the Culture-Insert. Twenty-  
393 four hours after seeding, the silicone confinement was removed, and the medium was  
394 replaced with Medium 199 (11043023; Life Technologies, Carlsbad, CA) supplemented  
395 with 1% bovine serum albumin (BSA), 100 unit mL<sup>-1</sup> penicillin, and 100 µg mL<sup>-1</sup>  
396 streptomycin. Beginning at 30 min after the removal of the silicone confinement, the  
397 cells were imaged with an epifluorescence microscope every 2 or 5 min.

398

### 399 **Fluorescence lifetime imaging**

400 For fluorescence lifetime imaging,  $3.5 \times 10^4$  MDCK cells were seeded in a Culture-  
401 Insert 2 well placed on a 24-well glass-bottom plate coated with 0.3 mg mL<sup>-1</sup> type I  
402 collagen. Twenty-four hours after seeding, the silicone confinement was removed, and  
403 the medium was exchanged for Medium 199 supplemented with 1% BSA, 100 unit mL<sup>-1</sup>  
404 penicillin, and 100 µg mL<sup>-1</sup> streptomycin. Six hours after the removal of the silicone  
405 confinement, the cells were imaged to measure the fluorescence lifetime of Turquoise.  
406 Lifetime imaging was performed with HC PL APO 20x/0.75 CS2 under a Leica TCS-  
407 SP8 microscope (Leica Microsystems GmbH, Wetzlar, Germany) equipped with a stage  
408 top incubator (Tokai Hit), a Lecia HyD SMD detector and a 440 nm picosecond pulsed  
409 diode laser (PDL 800-D; PicoQuant, Berlin, Germany), which pulsed at a frequency of  
410 80 MHz. The band path of emission wavelength was set from 450 nm to 485 nm. Time-  
411 lapse images were acquired every 10 min. The acquisition time for each measurement  
412 was 45 seconds. The amplitude-weighted mean fluorescence lifetimes were calculated

413 in a pixel-by-pixel fashion using fitting with a mono-exponential tail fit with adjustment  
414 of the number of components to two according to the manufacturer's protocol (Leica  
415 Microsystems GmbH, Wetzlar, Germany).

416

#### 417 **Western blotting with anti-phospho-ERK antibody**

418 For the Western blotting analysis,  $3.5 \times 10^4$  cells MDCK cells were seeded in a single  
419 well of a Culture-Insert 2 Well that was placed on a glass-bottom dish coated with 0.3  
420 mg mL<sup>-1</sup> type I collagen. Twenty-four hours after seeding, the silicone confinement was  
421 removed. The medium was replaced with Medium 199 supplemented with 1% BSA,  
422 100 unit mL<sup>-1</sup> penicillin, and 100 µg mL<sup>-1</sup> streptomycin. Six hours after the removal of  
423 the silicone confinement, MDCK cells were lysed with SDS sample buffer containing  
424 62.5 mM Tris-HCl (pH 6.8), 12% glycerol, 2% SDS, 40 ng mL<sup>-1</sup> bromophenol blue, and  
425 5% 2-mercaptoethanol, followed by sonication with a Bioruptor UCD-200 (Cosmo Bio,  
426 Tokyo, Japan). After boiling at 95°C for 5 min, the samples were resolved by SDS-  
427 PAGE on SuperSep Ace 5-20% precast gels (Wako, Tokyo, Japan), and transferred to  
428 PVDF membranes (Merck Millipore, Billerica, MA) for Western blotting. All antibodies  
429 were diluted in Odyssey blocking buffer (LI-COR Biosciences, Lincoln, NE). Proteins  
430 were detected by an Odyssey Infrared Imaging System (LI-COR Biosciences, Lincoln,  
431 NE).

432

#### 433 **Analysis of the cell migration distance in collective cell migration**

434 To measure the migration distance of cells, the FIJI TrackMate plugin was applied to the  
435 CFP fluorescence images to acquire the track of each cell. The migration distance of  
436 each cell was defined by the difference between the abscissae of the first and last time  
437 points, twelve or eight hours later. The data analysis was performed by MATLAB.

438

#### 439 **Quantification of ERK activity changes in single cells**

440 Timelapse images of the FRET/CFP ratio were generated after background subtraction  
441 by using Metamorph software (Molecular Devices, Sunnyvale, CA) as described  
442 previously (Aoki and Matsuda, 2009). For single cell analysis of the ERK activity  
443 change, the images were analyzed by using the FIJI plug-in (Schindelin et al., 2012). On  
444 CFP images, the following commands were applied sequentially: "8-bit", "Subtract  
445 Background..." with the rolling size of 50 pixels, "Make Binary" with the Otsu method,  
446 "Watershed", "Erode", and "TrackMate" for tracking of each cell. The time-series data  
447 of the coordinates of each cell and the FRET/CFP ratio were processed with a Savitzky-  
448 Golay filter to reduce the noise.

449 The coefficient of duration  $\omega_i$  and half of amplitude  $A_i$  were fitted as follows:

$$f_i(t) = \begin{cases} A_i \left( 1 + \sin \left( \frac{\pi}{2} + \frac{t-\theta_i}{\omega_i} \right) \right) & \text{if } -\pi < \frac{t-\theta_i}{\omega_i} < \pi \\ 0 & \text{otherwise} \end{cases}, \quad (1)$$

450 where  $i$  is the pulse index,  $t$  is the timepoint, and  $\theta_i$  is the timepoint of the pulse peak.

451 The programs used for sine curve fitting of MATLAB are shown in the Supporting  
452 Note.

453

#### 454 **Analysis of ERK activation waves with heat maps**

455 To determine the sample directions of ERK activation waves, heat maps of ERK activity  
456 were obtained by interpolating the signals in regions between the nuclei of MDCK cells  
457 in the FRET/CFP ratio images (Hino et al., 2020). The heat maps of ERK activity were  
458 analyzed by particle image velocimetry (PIV) using a free MATLAB-toolbox, MatPIV  
459 (Sveen, 2004), with a 128  $\mu\text{m}$  window size and a 75% window overlap. The directions  
460 of the calculated velocity vectors were obtained as the sample directions. To obtain the  
461 kymographs of FRET/CFP ratios, these values were averaged along the y-axis in a  
462 defined region of the images, providing an intensity line along the x-axis. The operation  
463 was repeated for the respective time points, and the intensity lines were stacked along  
464 the y-axis for all time points. The ERK activation waves were detected and counted  
465 after binarizing by using the Regionprops (Image Processing Toolbox) function in  
466 MATLAB.

467

#### 468 **Induction of ERK activation waves with rapamycin-inducible mSos1 translocation**

469 The rapamycin-inducible mSos1 translocation and Ras activation were reported  
470 previously (Aoki et al., 2011). MDCK-WT-EKARrEV-NLS-LDR-mRFP-FKBP-mSos1-  
471 linkercat cells were seeded in a well of the Culture-Insert 1 well placed on a 24-well  
472 glass-bottom plate (no. 5826-024, IWAKI, Shizuoka, Japan). MDCK-WT-EKARrEV-  
473 NLS cells or MDCK-4KO-EKARrEV-NLS cells were seeded in the outside of the  
474 silicone confinement. After twenty-four hours incubation, the silicone confinement was  
475 removed. Further incubation for forty-eight hours allowed the cells to fill the gap  
476 between the two cell populations. During observation of the interface between the two  
477 cell populations, rapamycin was added to a final concentration of 250 nM. To examine  
478 the propagation of ERK activation waves, heat maps of ERK activity were obtained by  
479 interpolating the signals in regions between the nuclei of cells in the FRET/CFP ratio  
480 images.

481

#### 482 **Analysis of the area of ERK activation waves**



483 To examine the area of the ERK activation waves, heat maps of ERK activity were  
484 obtained by interpolating the signals in regions between the nuclei of cells in the  
485 FRET/CFP ratio images. To obtain a binarized image of the interpolated FRET/CFP  
486 ratio images, first these ratio images were denoised, and then a locally adaptive  
487 threshold was computed for a 2D grayscale image by using “adaptthresh” in MATLAB,  
488 after which the following arguments were applied sequentially: “sensitivity” of 0.65,  
489 and “ForegroundPolarity” with “dark”. After obtaining binarized images, wave areas of  
490 each frame in each cell line from six to nine hours after releasing the silicone  
491 confinement was counted.

492

#### 493 **Analysis of the duration of the transient ERK activation after addition of** 494 **recombinant human EGFR ligands**

495 To examine the duration of the transient ERK activation after application of  
496 recombinant human EGFR ligands, time of ERK activation recovering to the half-  
497 maximal were calculated. The definition of half-maximal is the average of ratio value  
498 before EGFR ligands adding (basal) and just after adding (maximum) in each  
499 experiment.

500

#### 501 **Measurement of growth rate**

502 For the growth rate measurement,  $5 \times 10^4$  MDCK-5KO-EKARrEV-NLS-loxP-NRG1 or  
503 MDCK-5KO-EKARrEV-NLS-loxP-NRG1-CreERT2 cells were seeded in a 6-well plate  
504 (No. 140675, Thermo Fisher Scientific, Waltham, MA) and cultured in DMEM  
505 containing 10% FBS. After twenty-four hours incubation, 1  $\mu$ M 4-hydroxytamoxifen  
506 (no. 579002, Sigma-Aldrich, St. Louis, MO) or DMSO (no. 13445-74, Nacalai Tesque,  
507 Kyoto, Japan) was added. Fluorescence images of fixed locations were acquired with a  
508 UPlanFL-PH 10x/0.3 objective lens (Olympus) every twenty-four hours. Images were  
509 binarized to count the number of nuclei by FIJI.

510

#### 511 **Characterization of EKARrEV-NLS**

512 We first established MDCK cells stably expressing EKARrEV-NLS or the prototype  
513 EKAREV-NLS. Then,  $2 \times 10^4$  cells were seeded in a well of a 24-well glass-bottom  
514 plate coated with 0.3 mg mL<sup>-1</sup> type I collagen. After twenty-four hours, the medium was  
515 replaced with Medium 199 supplemented with 1% BSA, 100 unit mL<sup>-1</sup> penicillin, and  
516 100  $\mu$ g mL<sup>-1</sup> streptomycin. Fluorescence images were acquired with an UPLSAPO 20X  
517 objective (Olympus) every 2 min. During imaging, EGF (no. E9644; Sigma-Aldrich, St.  
518 Louis, MO) or trametinib (no. T-8123; LC Laboratories, Woburn, MA) was added to a

519 concentration of 100 ng mL<sup>-1</sup> or 200 nM final, respectively. After applying  
520 autothreshold, the fluorescence intensities of each nucleus were quantified to obtain  
521 FRET/CFP values as described previously (Aoki and Matsuda, 2009).

522

### 523 **Statistical analysis**

524 Probability (p) values were determined by using the T.TEST function of Microsoft  
525 Excel with two-tailed distribution and two-sample unequal variance.

526

527

528 **Acknowledgements**

529 We thank the members of the Matsuda Laboratory for their helpful input and  
530 encouragement, K. Hirano and K. Takakura for their technical assistance, Takahiko  
531 Matsuda for pCAG-CreERT2, and the Medical Research Support Center of Kyoto  
532 University for in vivo imaging. This work was supported by the Kyoto University Live  
533 Imaging Center. Financial support was provided in the form of JSPS KAKENHI grants  
534 (nos. 18K07066 to K.T., 20H05898 to M.M., and 19H00993 to M.M.), a JST CREST  
535 grant (no. JPMJCR1654), a Moonshot R&D grant (no. JPMJPS2022 to M.M.), and  
536 funds from the Fugaku Foundation (to M.M.).

537

538 **Author contributions**

539 S.L., K.A., N.H., K.T., and M.M. conceived and designed the study. S.L., D.H., G.M.,  
540 K.M., N.H., and E.D. acquired and analyzed the experimental data. R.I. provided  
541 plasmids and cells. S.L. and M.M. wrote the manuscript.

542

543 **Competing interests**

544 The authors declare no competing interests.

545

546 **References**

- 547 Aikin, T.J., A.F. Peterson, M.J. Pokrass, H.R. Clark, and S. Regot. 2020. MAPK activity  
548 dynamics regulate non-cell autonomous effects of oncogene expression. *eLife*.  
549 9:e60541.
- 550 Aoki, K., Y. Kondo, H. Naoki, T. Hiratsuka, R.E. Itoh, and M. Matsuda. 2017. Propagating  
551 wave of ERK activation orients collective cell migration. *Dev Cell*. 43:305-317.
- 552 Aoki, K., Y. Kumagai, A. Sakurai, N. Komatsu, Y. Fujita, C. Shionyu, and M. Matsuda.  
553 2013. Stochastic ERK activation induced by noise and cell-to-cell propagation  
554 regulates cell density-dependent proliferation. *Mol. Cell*. 52:529-540.
- 555 Aoki, K., and M. Matsuda. 2009. Visualization of small GTPase activity with fluorescence  
556 resonance energy transfer-based biosensors. *Nat Protoc*. 4:1623-1631.
- 557 Aoki, K., M. Yamada, K. Kunida, S. Yasuda, and M. Matsuda. 2011. Processive  
558 phosphorylation of ERK MAP kinase in mammalian cells. *Proc. Natl. Acad. Sci. U.*  
559 *S. A.* 108:12675-12680.
- 560 Boocock, D., N. Hino, N. Ruzickova, T. Hirashima, and E. Hannezo. 2021. Theory of  
561 mechanochemical patterning and optimal migration in cell monolayers. *Nat Phys*.  
562 17:267-274.

- 563 De Simone, A., M.N. Evanitsky, L. Hayden, B.D. Cox, J. Wang, V.A. Tornini, J. Ou, A. Chao,  
564 K.D. Poss, and S. Di Talia. 2021. Control of osteoblast regeneration by a train of  
565 Erk activity waves. *Nature (London)*. 590:129-133.
- 566 Draper, B.K., T. Komurasaki, M.K. Davidson, and L.B. Nanney. 2003. Epiregulin is more  
567 potent than EGF or TGF $\alpha$  in promoting in vitro wound closure due to enhanced  
568 ERK/MAPK activation. *J. Cell. Biochem.* 89:1126-1137.
- 569 Fan, H., and R. Derynck. 1999. Ectodomain shedding of TGF $\alpha$  and other  
570 transmembrane proteins is induced by receptor tyrosine kinase activation and MAP  
571 kinase signaling cascades. *EMBO J.* 18:6962-6972.
- 572 Freed, D.M., N.J. Bessman, A. Kiyatkin, E. Salazar-Cavazos, P.O. Byrne, J.O. Moore, C.C.  
573 Valley, K.M. Ferguson, D.J. Leahy, D.S. Lidke, and M.A. Lemmon. 2017. EGFR  
574 ligands differentially stabilize receptor dimers to specify signaling kinetics. *Cell*.  
575 171:683-695.e618.
- 576 Friedl, P., and D. Gilmour. 2009. Collective cell migration in morphogenesis, regeneration  
577 and cancer. *Nat Rev Mol Cell Biol.* 10:445-457.
- 578 Harris, R.C., E. Chung, and R.J. Coffey. 2003. EGF receptor ligands. *Exp. Cell Res.* 284:2-  
579 13.
- 580 Hino, N., L. Rossetti, A. Marín-Llauradó, K. Aoki, X. Trepát, M. Matsuda, and T.  
581 Hirashima. 2020. ERK-mediated mechanochemical waves direct collective cell  
582 polarization. *Dev Cell.* 53:646-660.
- 583 Hiratsuka, T., Y. Fujita, H. Naoki, K. Aoki, Y. Kamioka, and M. Matsuda. 2015.  
584 Intercellular propagation of extracellular signal-regulated kinase activation  
585 revealed by in vivo imaging of mouse skin. *eLife.* 4:e05178.
- 586 Ishii, M., T. Tateya, M. Matsuda, and T. Hirashima. 2021. Retrograde ERK activation  
587 waves drive base-to-apex multicellular flow in murine cochlear duct morphogenesis.  
588 *eLife.* 10:e61092.
- 589 Joslin, E.J., L.K. Opresko, A. Wells, H.S. Wiley, and D.A. Lauffenburger. 2007. EGF-  
590 receptor-mediated mammary epithelial cell migration is driven by sustained ERK  
591 signaling from autocrine stimulation. *J. Cell Sci.* 120:3688-3699.
- 592 Kawakami, K., H. Takeda, N. Kawakami, M. Kobayashi, N. Matsuda, and M. Mishina.  
593 2004. A transposon-mediated gene trap approach identifies developmentally  
594 regulated genes in zebrafish. *Dev. Cell.* 7:133-144.
- 595 Matsuda, T., and C.L. Cepko. 2007. Controlled expression of transgenes introduced by in  
596 vivo electroporation. *Proc. Natl. Acad. Sci. U. S. A.* 104:1027-1032.
- 597 Mayor, R., and S. Etienne-Manneville. 2016. The front and rear of collective cell migration.  
598 *Nat Rev Mol Cell Biol.* 17:97-109.

- 599 Naito, Y., K. Hino, H. Bono, and K. Ui-Tei. 2015. CRISPRdirect: software for designing  
600 CRISPR/Cas guide RNA with reduced off-target sites. *Bioinformatics*. 31:1120-1123.
- 601 Nanba, D., F. Toki, Y. Barrandon, and S. Higashiyama. 2013. Recent advances in the  
602 epidermal growth factor receptor/ligand system biology on skin homeostasis and  
603 keratinocyte stem cell regulation. *J. Dermatol. Sci.*
- 604 Ogura, Y., F.L. Wen, M.M. Sami, T. Shibata, and S. Hayashi. 2018. A Switch-like Activation  
605 Relay of EGFR-ERK Signaling Regulates a Wave of Cellular Contractility for  
606 Epithelial Invagination. *Dev Cell*. 46:162-172 e165.
- 607 Ponsioen, B., J.B. Post, J.R. Buissant des Amorie, D. Laskaris, R.L. van Ineveld, S. Kersten,  
608 A. Bertotti, F. Sassi, F. Sipieter, B. Cappe, S. Mertens, I. Verlaan-Klink, S.F. Boj,  
609 R.G.J. Vries, H. Rehmann, P. Vandenabeele, F.B. Riquet, L. Trusolino, J.L. Bos, and  
610 H.J.G. Snippert. 2021. Quantifying single-cell ERK dynamics in colorectal cancer  
611 organoids reveals EGFR as an amplifier of oncogenic MAPK pathway signalling.  
612 *Nat Cell Biol*.
- 613 Prince, R.N., E.R. Schreiter, P. Zou, H.S. Wiley, A.Y. Ting, R.T. Lee, and D.A. Lauffenburger.  
614 2010. The heparin-binding domain of HB-EGF mediates localization to sites of cell-  
615 cell contact and prevents HB-EGF proteolytic release. *J. Cell Sci*. 123:2308.
- 616 Riese, D.J., 2nd, and R.L. Cullum. 2014. Epiregulin: roles in normal physiology and cancer.  
617 *Semin. Cell Dev. Biol*. 28:49-56.
- 618 Schindelin, J., I. Arganda-Carreras, E. Frise, V. Kaynig, M. Longair, T. Pietzsch, S.  
619 Preibisch, C. Rueden, S. Saalfeld, B. Schmid, J.-Y. Tinevez, D.J. White, V.  
620 Hartenstein, K. Eliceiri, P. Tomancak, and A. Cardona. 2012. Fiji: an open-source  
621 platform for biological-image analysis. *Nat Methods*. 9:676-682.
- 622 Schneider, M.R., S. Werner, R. Paus, and E. Wolf. 2008. Beyond wavy hairs: the epidermal  
623 growth factor receptor and its ligands in skin biology and pathology. *Am. J. Pathol*.  
624 173:14-24.
- 625 Shukla, P., C. Vogl, B. Wallner, D. Rigler, M. Muller, and S. Macho-Maschler. 2015. High-  
626 throughput mRNA and miRNA profiling of epithelial-mesenchymal transition in  
627 MDCK cells. *BMC genomics*. 16:944.
- 628 Singh, B., G. Carpenter, and R.J. Coffey. 2016. EGF receptor ligands: recent advances.  
629 *F1000Research*. 5.
- 630 Singh, B., and R.J. Coffey. 2014. From wavy hair to naked proteins: the role of transforming  
631 growth factor alpha in health and disease. *Semin. Cell Dev. Biol*. 28:12-21.
- 632 Sumiyama, K., K. Kawakami, and K. Yagita. 2010. A simple and highly efficient  
633 transgenesis method in mice with the Tol2 transposon system and cytoplasmic  
634 microinjection. *Genomics*. 95:306-311.

- 635 Sunnarborg, S.W., C.L. Hinkle, M. Stevenson, W.E. Russell, C.S. Raska, J.J. Peschon, B.J.  
636 Castner, M.J. Gerhart, R.J. Paxton, R.A. Black, and D.C. Lee. 2002. Tumor necrosis  
637 factor-alpha converting enzyme (TACE) regulates epidermal growth factor receptor  
638 ligand availability. *J. Biol. Chem.* 277:12838-12845.
- 639 Sveen, K. 2004. An introduction to MatPIV 1.6.1.
- 640 Takazaki, R., Y. Shishido, R. Iwamoto, and E. Mekada. 2004. Suppression of the Biological  
641 Activities of the Epidermal Growth Factor (EGF)-like Domain by the Heparin-  
642 binding Domain of Heparin-binding EGF-like Growth Factor \*. *J. Biol. Chem.*  
643 279:47335-47343.
- 644 Taylor, S.R., M.G. Markesbery, and P.A. Harding. 2014. Heparin-binding epidermal growth  
645 factor-like growth factor (HB-EGF) and proteolytic processing by a disintegrin and  
646 metalloproteinases (ADAM): a regulator of several pathways. *Semin. Cell Dev. Biol.*  
647 28:22-30.
- 648 Wilson, K.J., J.L. Gilmore, J. Foley, M.A. Lemmon, and D.J. Riese, 2nd. 2009. Functional  
649 selectivity of EGF family peptide growth factors: implications for cancer.  
650 *Pharmacol. Ther.* 122:1-8.
- 651 Yarden, Y., and M.X. Sliwkowski. 2001. Untangling the ErbB signalling network. *Nature*  
652 *Reviews Molecular Cell Biology.* 2:127-137.
- 653 Yusa, K., R. Rad, J. Takeda, and A. Bradley. 2009. Generation of transgene-free induced  
654 pluripotent mouse stem cells by the piggyBac transposon. *Nat Methods.* 6:363-369.
- 655 Zeng, F., and R.C. Harris. 2014. Epidermal growth factor, from gene organization to  
656 bedside. *Semin. Cell Dev. Biol.* 28:2-11.
- 657
- 658 



659 **Figures**

**Fig.1**

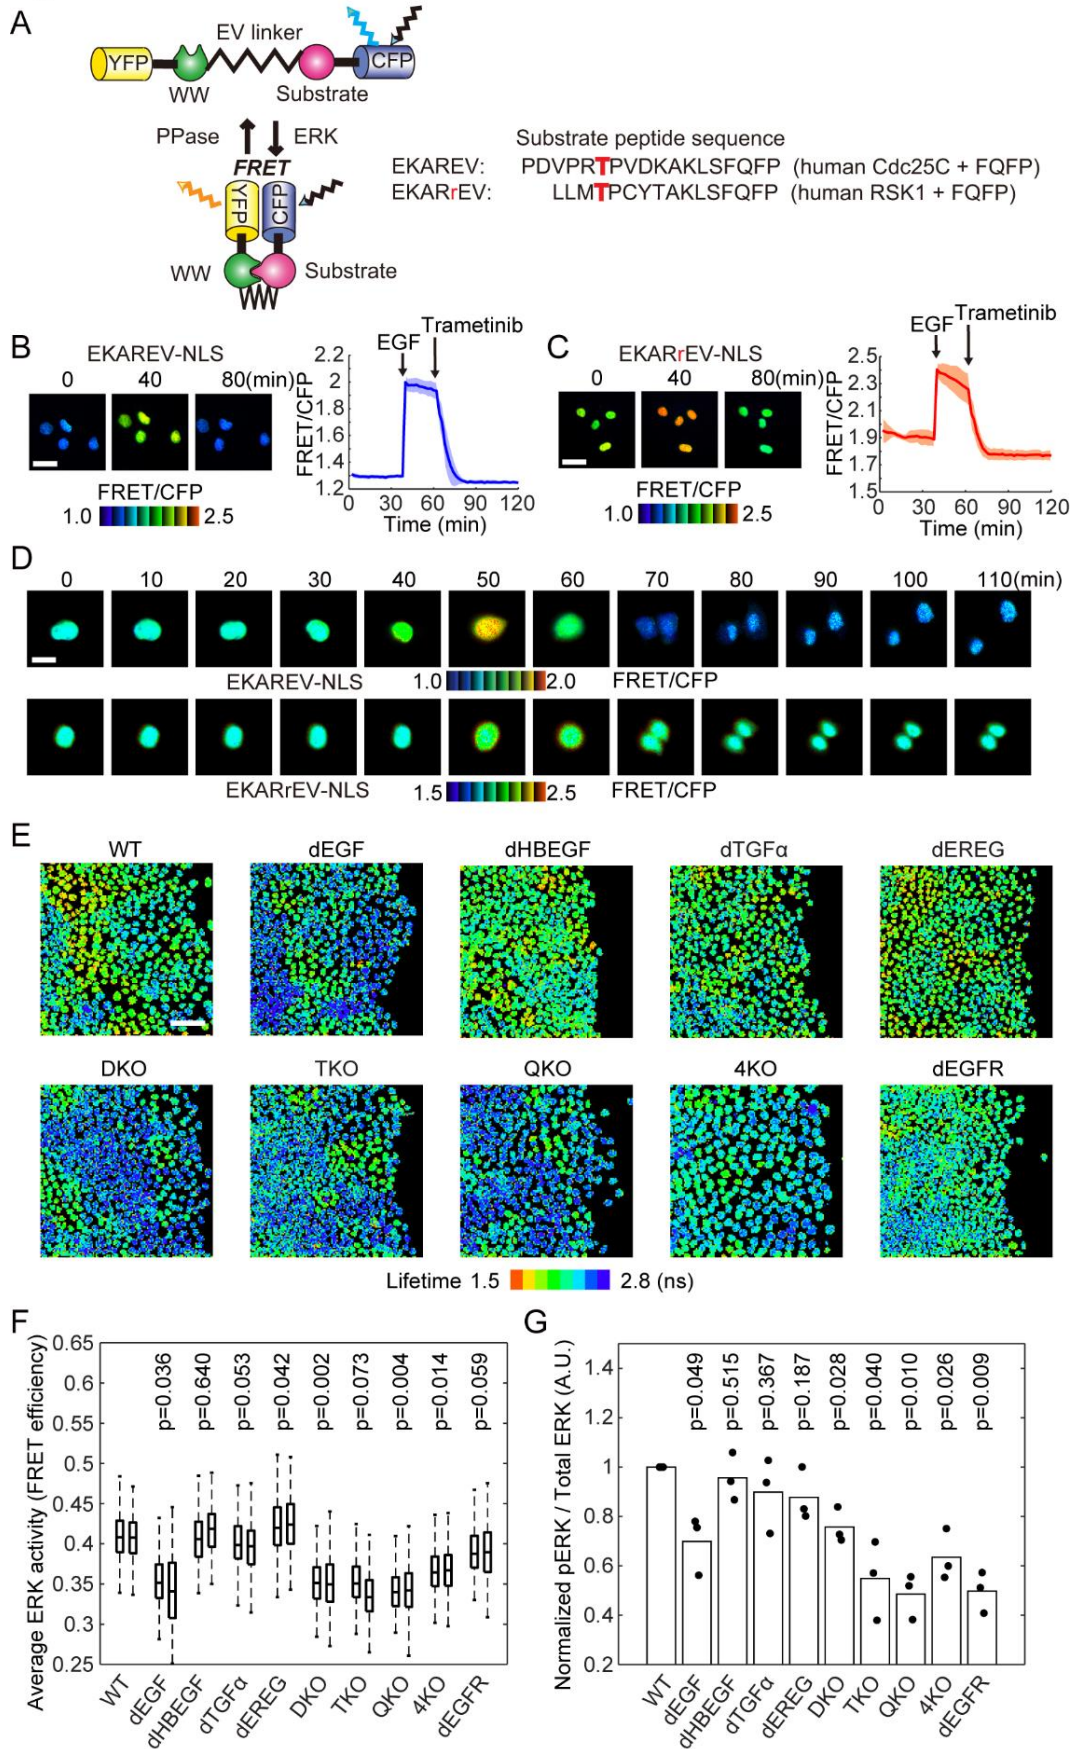

660 **Figure 1. Properties of EKARrEV-NLS biosensor and ERK activity of MDCK cell**  
661 **lines after knockout of EGFR ligand genes**

662 (A) Mode of action of the intramolecular FRET biosensors for ERK, EKAREV and  
663 EKARrEV. The red character T indicates the phosphorylation site. (B and C) MDCK  
664 cells expressing EKAREV-NLS (B) or EKARrEV-NLS (C) were observed under a wide  
665 field fluorescence microscope to acquired FRET/CFP time lapse images. During  
666 imaging, 10 ng mL<sup>-1</sup> EGF and 200 nM trametinib were added. Representative ratio  
667 images are shown in the IMD mode. Line plots show time courses of the FRET/CFP  
668 ratio for 4 cells from a single experiment. Solid lines represent the means; shaded areas  
669 represent SD. Scale bar, 40 μm. (D) MDCK cells expressing EKAREV-NLS (top) or  
670 EKARrEV NLS (bottom) were imaged during mitosis, shown in the IMD mode. Scale  
671 bar, 20 μm. (E) Lifetime images of the donor fluorescence was acquired by a confocal  
672 microscope equipped with a 440 nm picosecond pulsed diode laser. MDCK cells are  
673 WT, single gene knockout (dEGF, dHBEGF, dTGFα, and dEREG), *Egf/Hbegf* double  
674 knockout (DKO), *Egf/Hbegf/Tgfa* triple knockout (TKO), and *Egf/Hbegf/Tgfa/Ereg*  
675 quadruple knockout (QKO and 4KO), and *Efgr* knockout (dEGFR). (F) Cells are  
676 timelapse imaged every 10 minutes for 100 min. FRET efficiency of randomly chosen  
677 cells was plotted for each cell line. The total number of analyzed cells from two  
678 independent experiments is as follows: WT, 271 and 231 cells; dEGF, 250 and 255 cells;  
679 dHBEGF, 260 and 136 cells; dTGFα, 227 and 163 cells; dEREG, 136 and 155 cells;  
680 DKO, 311 and 241 cells; TKO, 253 and 229 cells; QKO, 263 and 232 cells; 4KO, 252  
681 and 255 cells; dEGFR, 217 and 155 cells. (G) Nine hours after the removal of silicone  
682 confinement, MDCK cells were analyzed by immunoblotting with anti-phospho-ERK  
683 or anti-pan-ERK antibody. The phospho-ERK signal normalized to the pan-ERK signal  
684 is shown. Data from three independent experiments are shown. p values of two-tailed t-  
685 test are shown on the top of panels F and G.

Fig.2

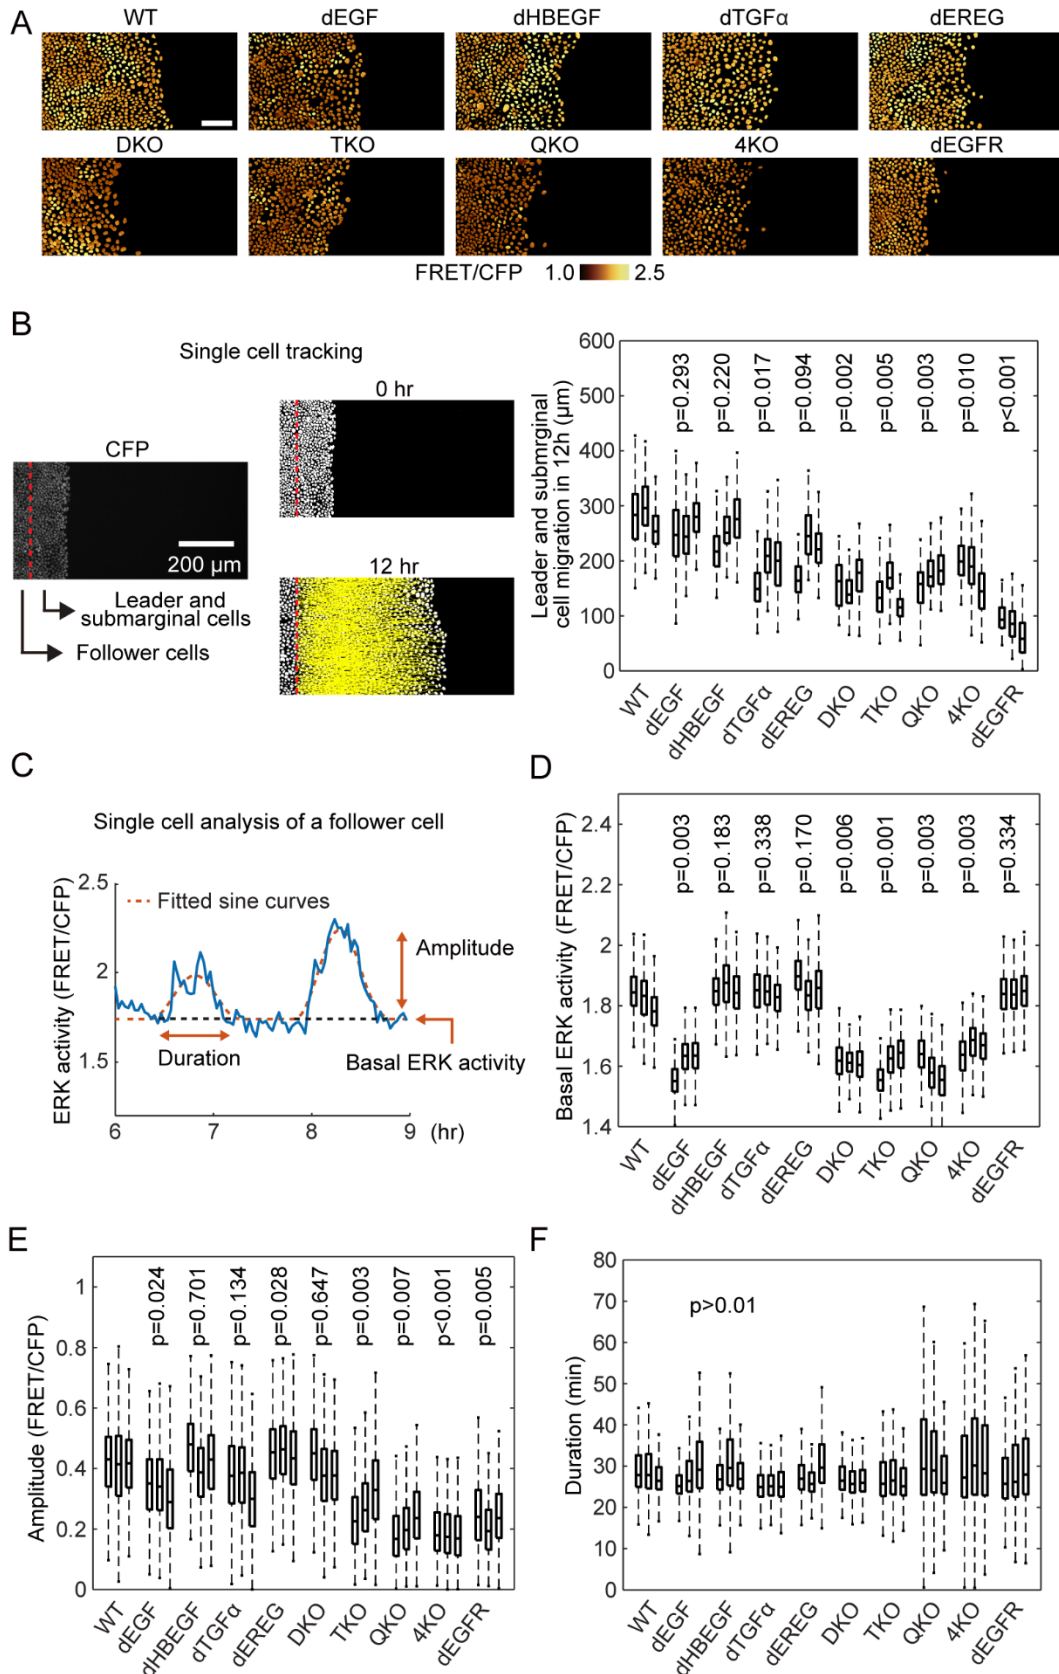

687 **Figure 2. Single-cell analyses of ERK-activation dynamics in MDCK cells deficient**  
688 **of EGFR ligands**

689 MDCK cells expressing EKARrEV were subjected to confinement release assay. (A)  
690 Time lapse images of FRET/CFP ratio were acquired every 2 minutes for up to twelve  
691 hours to generate Video 1. Shown are snap shots cropped from the Video. Scale bar, 100  
692  $\mu\text{m}$ . (B) We defined the cells locating within 100  $\mu\text{m}$  from the edge of the open space as  
693 the leader and submarginal cells, the others as follower cells. CFP channel images were  
694 binarized for single cell detection. From the track of the leader and submarginal cells,  
695 migration distance in twelve hours was measured (left). Boxplot of leader and  
696 submarginal cell migration in twelve hours observation (right). The total number of  
697 analyzed cells from three independent experiments is as follows: WT, 395, 167, and 298  
698 cells; dEGF, 386, 408 and 178 cells; dHBEGF, 447, 370 and 478 cells; dTGF $\alpha$ , 408,  
699 366, and 388 cells; dREG, 505, 525, and 504 cells; DKO, 256, 233, and 304 cells;  
700 TKO, 197, 270, and 229 cells; QKO, 278, 463 and 441 cells; 4KO, 407, 233 and 154  
701 cells; dEGFR, 584, 303 and 217 cells. (C) After applying a mask for nuclei of the  
702 follower cells, the time course of FRET/CFP ratio in each cell was analyzed from six to  
703 nine hours after the start of migration (blue line). The ratio values were fitted by sine  
704 curves for the detection of waves (red line). For each wave, basal ERK activity (D),  
705 amplitude (E) and duration (F) were determined. The numbers of analyzed cells are as  
706 follows: WT, 814, 801, and 990 cells; dEGF, 789, 596 and 789 cells; dHBEGF, 846, 617  
707 and 683 cells; dTGF $\alpha$ , 808, 762, and 838 cells; dREG, 762, 1030, and 953 cells; DKO,  
708 638, 656, and 560 cells; TKO, 649, 778, and 567 cells; QKO, 507, 638 and 567 cells;  
709 4KO, 681, 291 and 451 cells; dEGFR, 643, 493 and 684 cells. p values of two-tailed t-  
710 test (WT to others) are shown on the top of panels B, D-F.



Fig.3

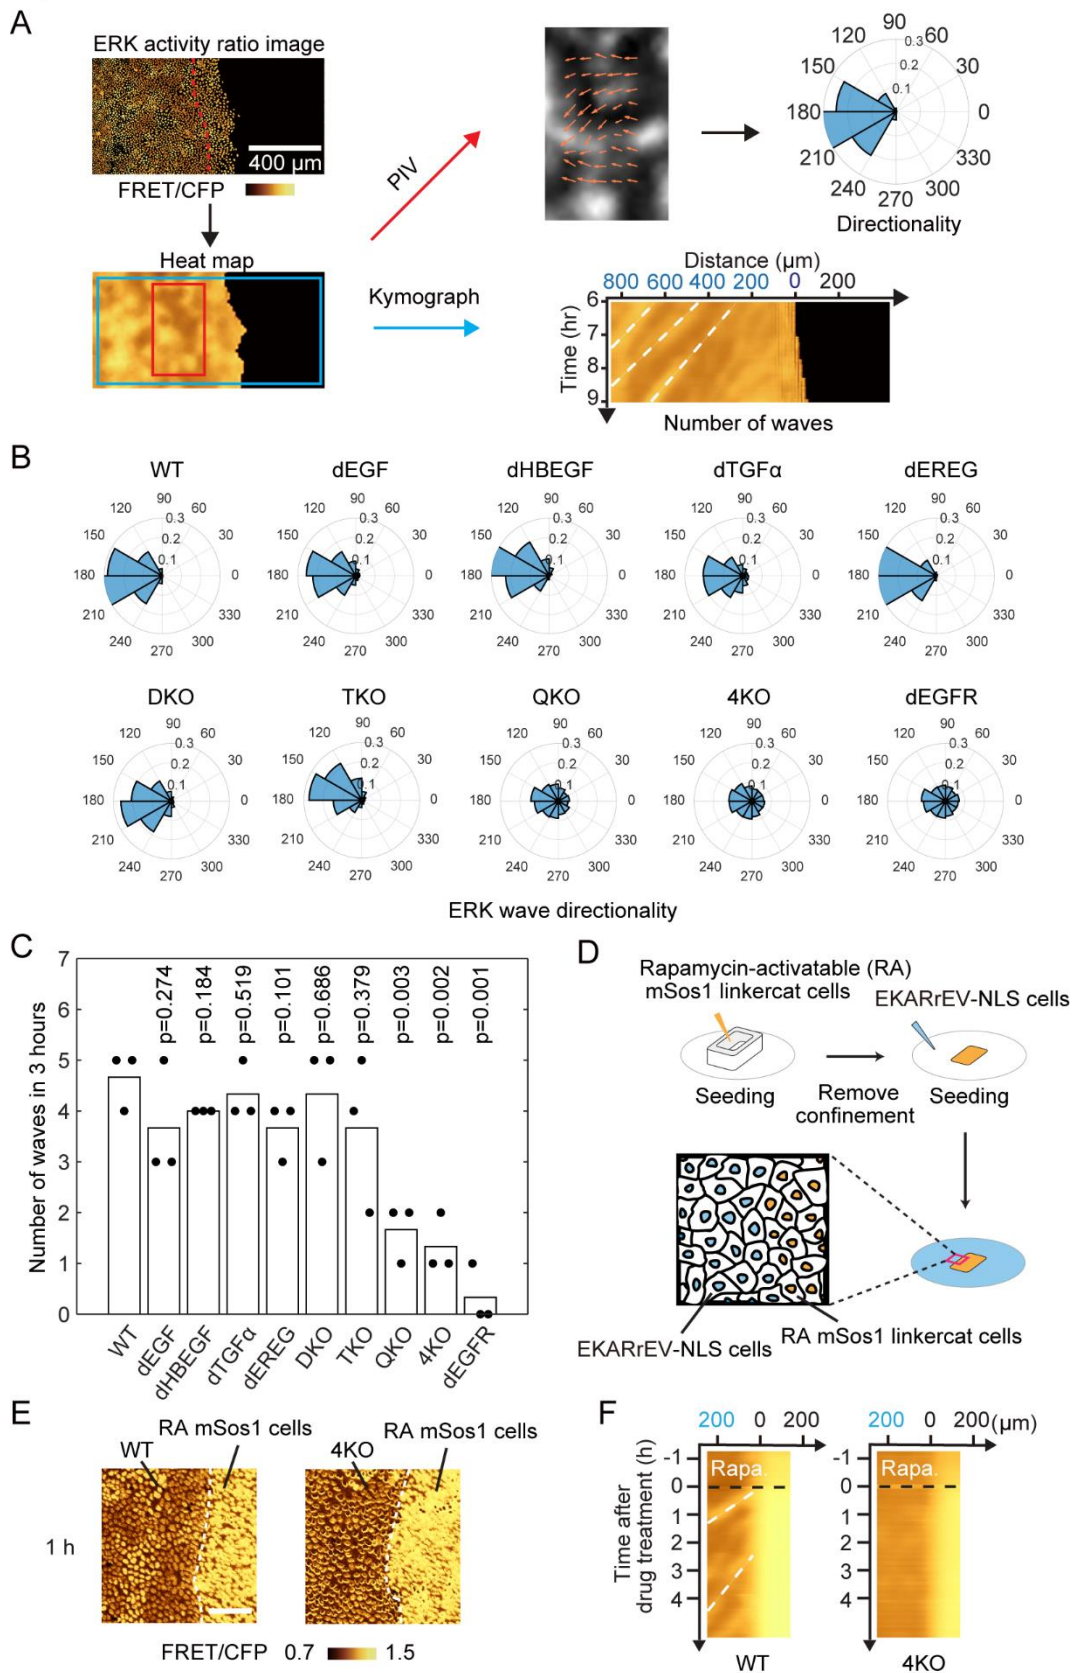

712 **Figure 3. Propagation of ERK activation waves from leader cells**

713 (A) Heat maps of ERK activity were obtained by interpolating the signals between the  
714 nuclei of cells and used for particle image velocimetry (PIV) and kymograph analysis.  
715 Directionality was measured by PIV and shown with polar histogram. Kymograph was  
716 obtained by interpolated ratio image. White broken lines indicate representative ERK  
717 waves. (B) The direction of ERK activation wave from six to nine hours after releasing  
718 of silicone confinement was shown by Polar histograms. Shown are summation of three  
719 independent experiments. (C) During the period of six to nine hours after the release of  
720 silicone confinement, the number of ERK activation waves from the leader cells was  
721 manually counted on the kymograph. Each dot represents the number of counted ERK  
722 activation waves in an independent experiment. p values of two-tailed t-test (WT to  
723 thers) are shown on the top. (D-F) For the artificial generation of ERK activation waves,  
724 MDCK cells expressing EKARrEV and rapamycin-activatable mSos1 was seeded in a  
725 silicone confinement. MDCK cells expressing EKARrEV alone were seeded in the  
726 surrounding area (D). Upon rapamycin addition, ERK activation waves were generated  
727 at the border of cell lines. (E) Time lapse FRET/CFP ratio images were acquired to  
728 generate Video 2. Shown are representative FRET/CFP ratio images 1 hour after  
729 addition of rapamycin. White broken lines indicate the border of cell lines. Scale bar, 50  
730  $\mu\text{m}$ . (F) Kymographs of ERK activity in MDCK-WT and MDCK-4KO cells upon  
731 rapamycin addition. White broken lines indicate representative ERK waves.



732

Fig.4

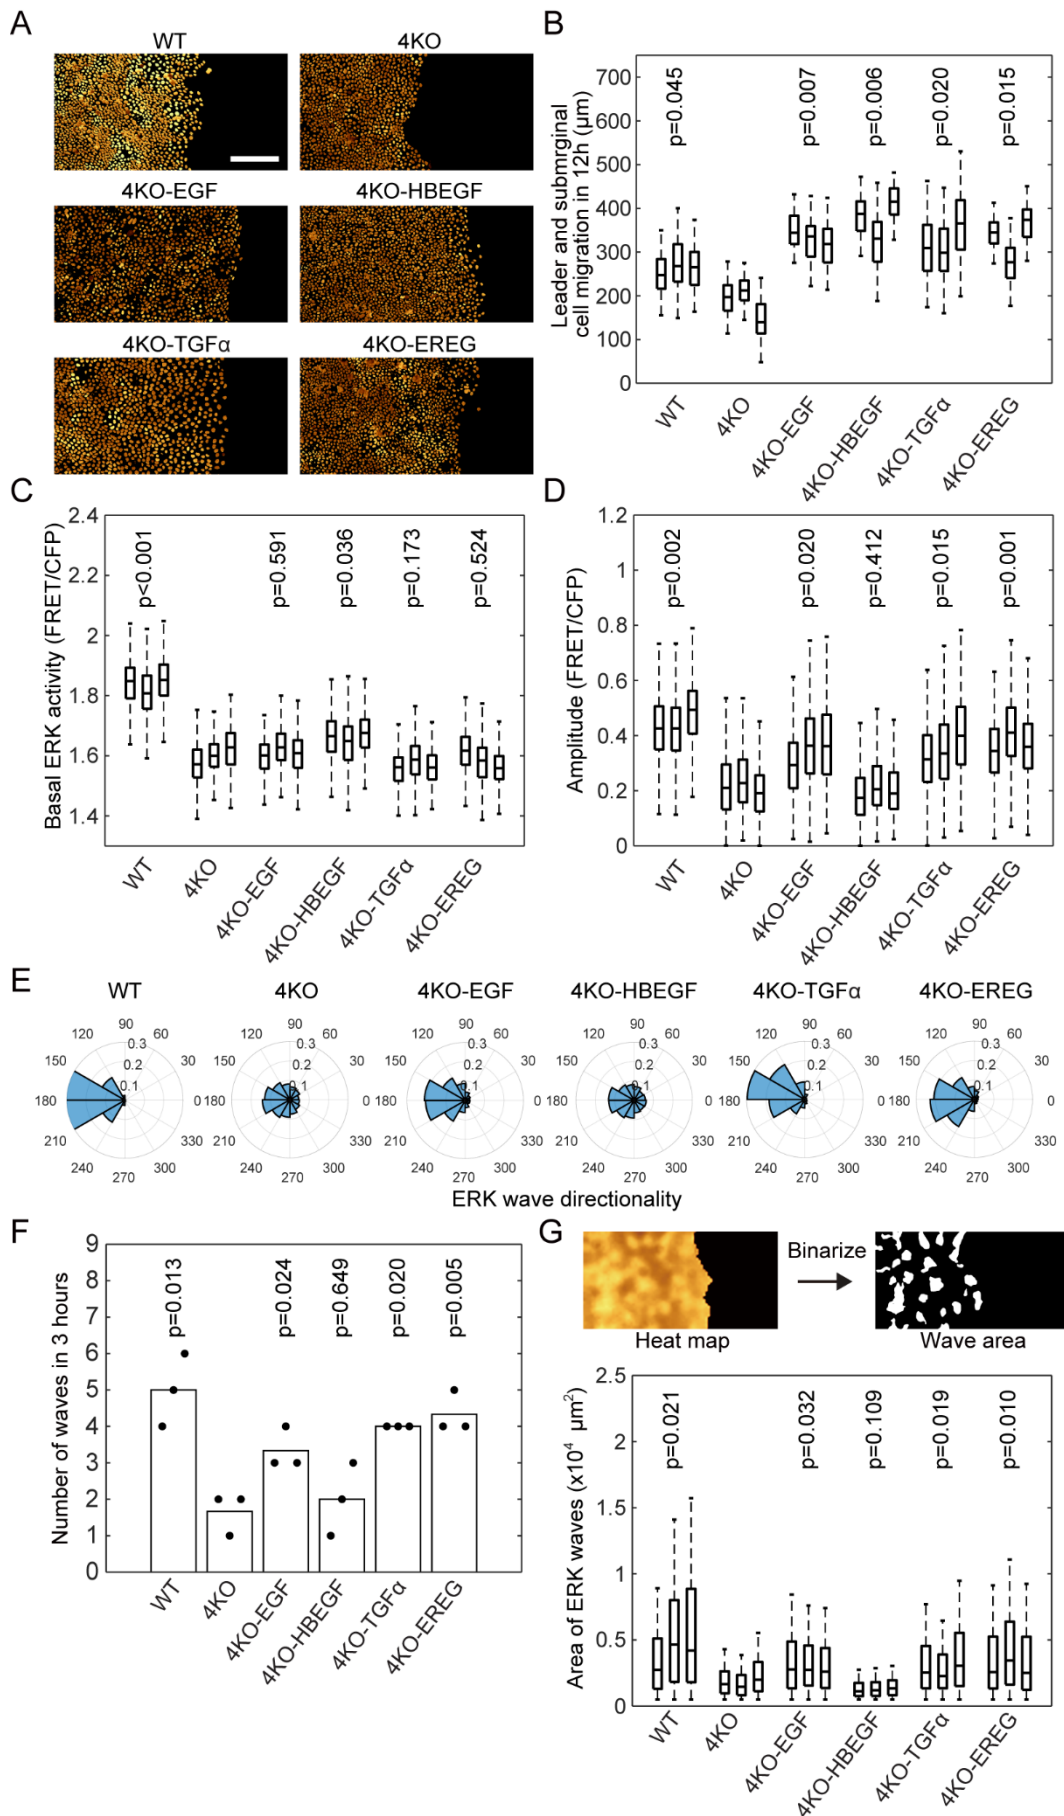

733 **Figure 4. Restoration of ERK activation waves by expression of EGFR ligands in**  
734 **4KO cells**

735 The MDCK-4KO cells expressing the EKARrEV biosensor were transfected stably with  
736 an expression vector for cDNA of canine Egf, Hbegf, Tgf $\alpha$ , or Ereg; the resulting cell  
737 lines were named as 4KO-EGF, 4KO-HBEGF, 4KO-TGF $\alpha$  and 4KO-EREG,  
738 respectively. WT, 4KO and EGFR ligands expressing 4KO cells were subjected to  
739 confinement release assay. Three independent experiments were performed for each cell  
740 line. (A) Time lapse FRET/CFP ratio images were acquired to generate Video 3. Shown  
741 are snap shots cropped from the Video. Scale bar, 200  $\mu$ m. (B) Boxplot of leader and  
742 submarginal cell migration in twelve hours observation. The number of analyzed cells  
743 from three independent experiments is as follows: WT, 357, 215 and 283 cells; 4KO,  
744 348, 274, and 328 cells; 4KO-EGF, 130, 426, and 420 cells; 4KO-HBEGF, 224, 360,  
745 and 368 cells; 4KO-TGF $\alpha$ , 192, 300, and 215 cells; 4KO-EREG, 112, 404, and 373  
746 cells. Data of three independent experiments are shown. (C-D) Box plots of basal ERK  
747 activity (C) and amplitude (D) of ERK activation in each cell line from six to nine hours  
748 after releasing of silicone confinement. The numbers of analyzed cells are as follows:  
749 WT, 703, 945 and 653 cells; 4KO, 656, 446, and 556 cells; 4KO-EGF, 576, 697, and  
750 732 cells; 4KO-HBEGF, 667, 596, and 556 cells; 4KO-TGF $\alpha$ , 452, 638, and 484 cells;  
751 4KO-EREG, 757, 786, and 902 cells. Data of three independent experiments are shown.  
752 (E) Polar histograms showing the distribution of ERK wave direction from six to nine  
753 hours after releasing of silicone confinement. Shown are summation of three  
754 independent experiments. (F) During the period of six to nine hours after the release of  
755 silicone confinement, the number of ERK activation waves from the leader cells was  
756 counted. Each dot represents the number of counted ERK activation waves in an  
757 independent experiment. (G) Wave area was measured after binarizing the denoised  
758 interpolated ratio image (upper). Box plots of the ERK wave area in each cell line at  
759 each frame from six to nine hours after releasing of silicone confinement. Data of three  
760 independent experiments are shown. p values of two-tailed t-test (4KO to others) are  
761 shown in panels B, C, D, F and G.

Fig.5

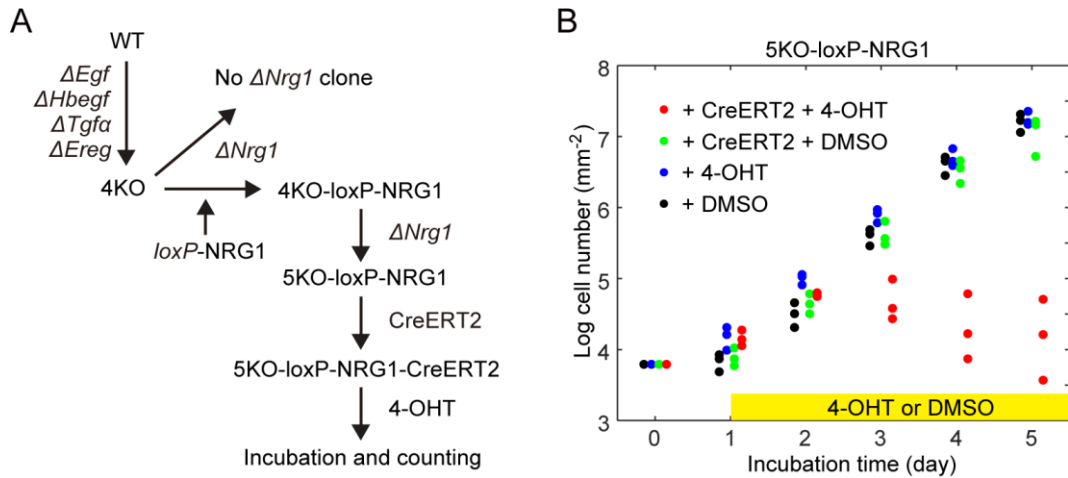

762

763 **Figure 5. Growth arrest of cells deficient from all EGFR ligands**

764 (A) Schematics of experiment to obtain 5KO cell line. The MDCK-4KO cells expressing  
765 EKARrEV biosensor were transfected stably with an expression vector for *loxP*-NRG1-  
766 *loxP* named as 4KO-loxP-NRG1. Then 5KO-loxP-NRG1 was generated by knocking out  
767 endogenous *Nrg1*. Followed by integrating CreERT2, 5KO-loxP-NRG1-CreERT2 was  
768 treated with 4-OHT to obtain 5KO cell line. (B) The growth rate represented on a log (cell  
769 number) basis. Cell numbers was measured over five days post-seeding of 5KO-loxP-  
770 NRG1 cell line with addition of 4-OHT (blue dots) or DMSO (black dots) and 5KO-loxP-  
771 NRG1-CreERT2 cell line with addition of 4-OHT (red dots) or DMSO (green dots) at day  
772 one. Each dot represents cell number in an independent experiment.

773 **Video 1. ERK activation waves in WT and mutant MDCK cells during collective**  
774 **cell migration, related to figure 2A**

775 Time-lapse movie of collectively migrating MDCK cells expressing EKARrEV-NLS.  
776 The golden pseudo-color represents the FRET/CFP ratio indicating ERK activity. The  
777 color scales correspond to those in figure 2A. Time in h:min.

778

779 **Video 2. Propagation of ERK activation waves upon rapamycin induced ERK**  
780 **activation, related to figure 3E**

781 Time-lapse movie of the boundary between confluent MDCK WT (left) or 4KO (right)  
782 cells with rapamycin-activatable mSos1 expression WT cells. The color represents the  
783 FRET/CFP ratio indicating ERK activity. The cells were treated with 250 nM rapamycin  
784 at 0 min to induce ERK activation of the RA mSos1 expressing cells. Time in h:min.

785

786 **Video 3. ERK activation waves in WT, 4KO and 4KO expressing EGFR ligands**  
787 **MDCK cells during collective cell migration, related to figure 4A**

788 Time-lapse movie of collectively migrating MDCK cells expressing EKARrEV-NLS.  
789 The golden pseudo-color represents the FRET/CFP ratio indicating ERK activity. The  
790 color scales correspond to those in figure 4A. Time in h:min.

791

792 **Video 4. Restored leader cell migration upon addition of recombinant EGFR**  
793 **ligands, related to figure S3A**

794 Time-lapse movie of collectively migrating MDCK cells expressing EKARrEV-NLS.  
795 The golden pseudo-color represents the FRET/CFP ratio indicating ERK activity.  
796 MDCK 4KO cells were treated with 10ng mL<sup>-1</sup> recombinant human EGF, HBEGF,  
797 TGF $\alpha$  or EREG at 0 min. Time in h:min.

798 **Supplementary figures**

799

**Fig.S1**

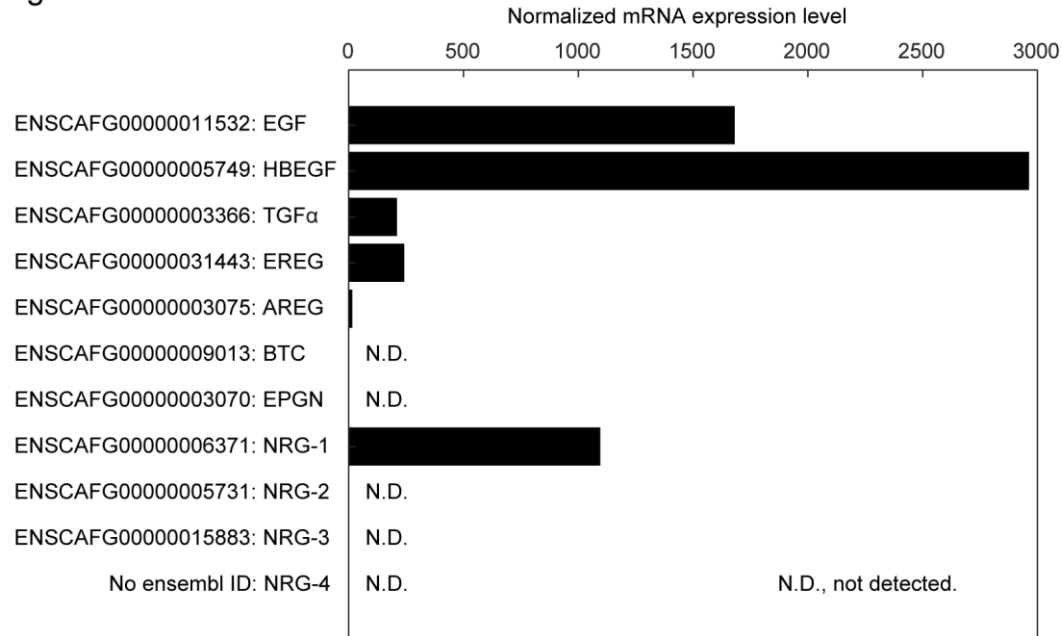

800

801 **Figure S1. mRNA expression level of EGFR ligands in MDCK cells**

802 Normalized mRNA expression level of EGFR ligands in MDCK cells calculated from

803 RNA-Seq data (Shukla et al., 2015). N.D., not detected.

Fig.S2

**A**

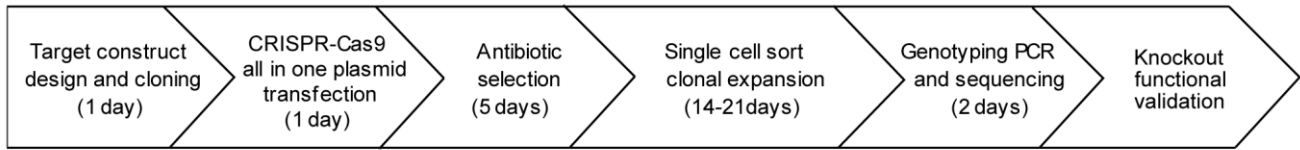

**B**

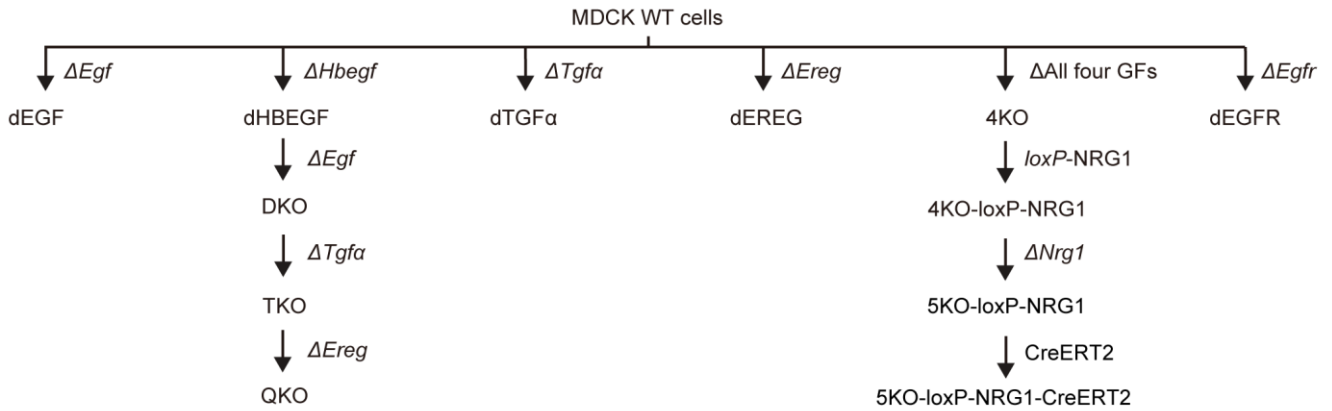

**C**

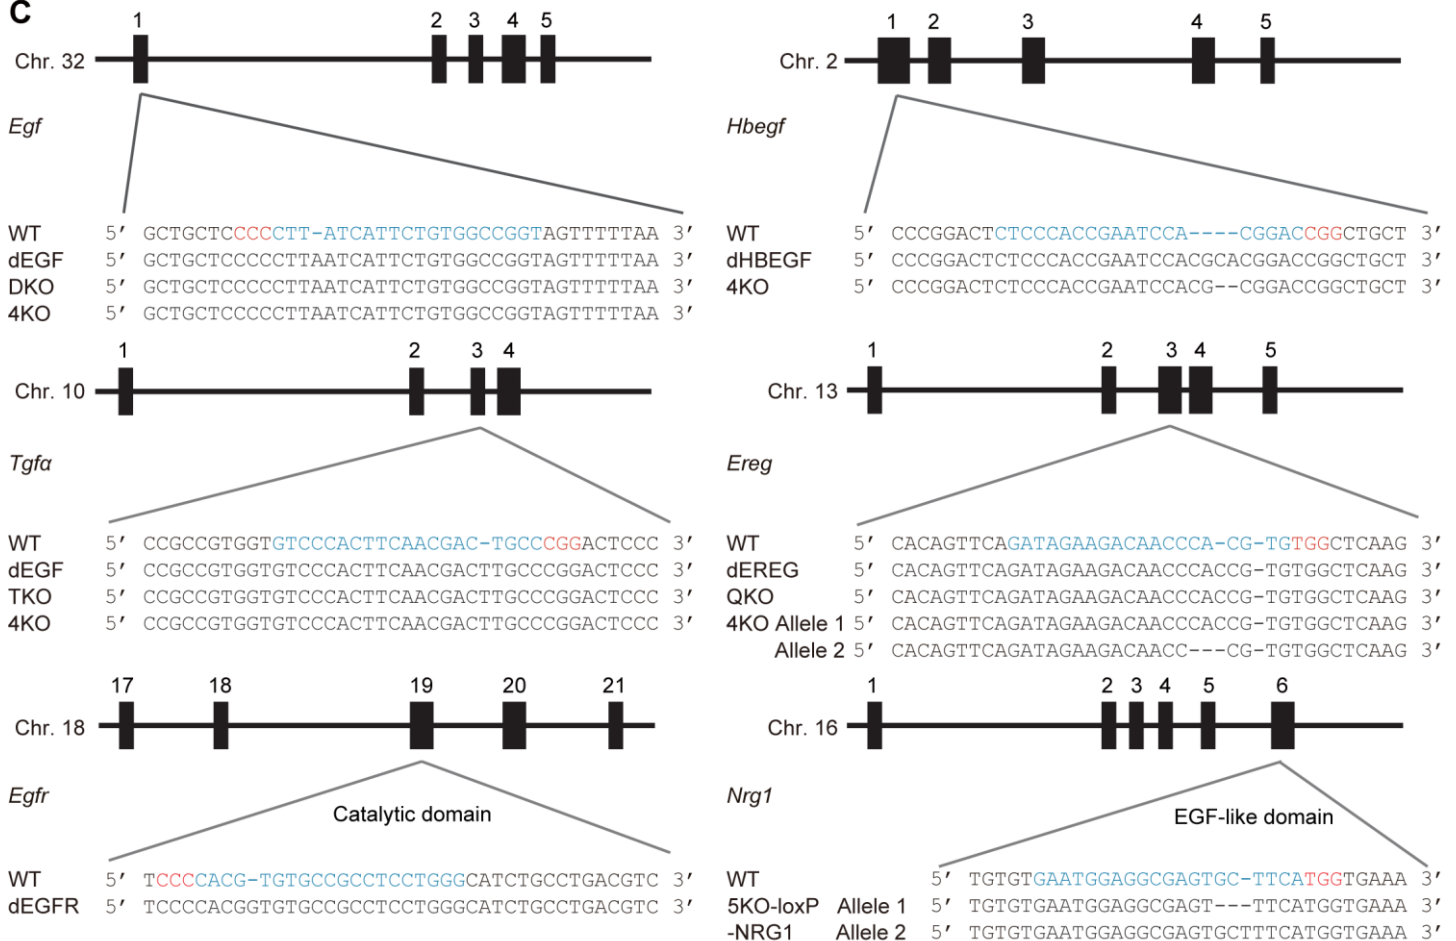



805 **Figure S2. Generation of gene knockouts**

806 (A) Workflow for generation of gene knockouts in MDCK cell lines. (B) Phylogenetic  
807 tree of the MDCK cells used in this study. (C) Mutations of the targeted genes in the  
808 MDCK cell lines. Black rectangles depict exons. The gRNA and PAM sequences are  
809 depicted in blue and red, respectively.

Fig.S3

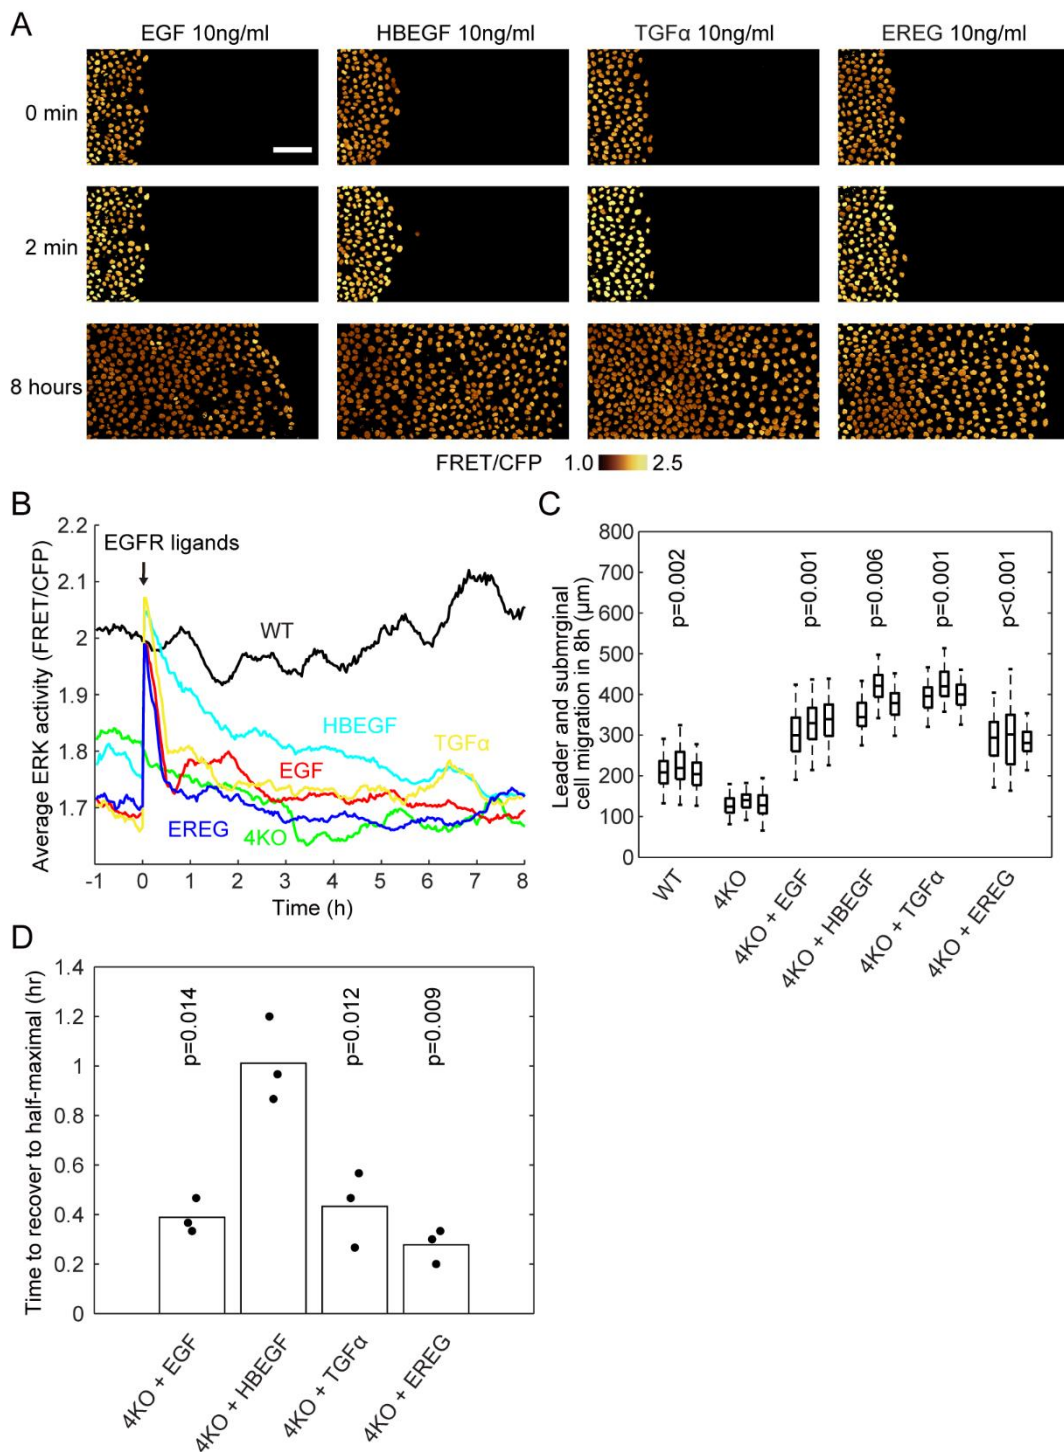

810

811 **Figure S3. Restoration of migration by addition of EGFR ligands in 4KO cells**

812 (A) 4KO cells were subjected to confinement release assay as described in the legend to

813 Figure 1. Images of CFP and FRET channels were acquired every 2 minutes for twelve

814 hours (Video 4). Shown are snapshots before, just and 8 hours after the addition of 10  
815  $\text{ng mL}^{-1}$  recombinant EGFR ligands. Scale bar, 100  $\mu\text{m}$ .(B) Time course of the average  
816 FRET/CFP ratio. At time 0 hour, 10ng/ml recombinant human EGF (red), HBEGF (light  
817 blue), TGF $\alpha$  (yellow) and EREG (blue) were added to 4KO cell lines. (C) Leader cell  
818 migration in eight hours after the addition of EGFR ligands or after the release of  
819 silicone confinement (WT and 4KO). The numbers of analyzed cells are as follows:  
820 WT, 357, 215 and 283 cells; 4KO, 348, 274, and 328 cells; 4KO + EGF, 154, 128, and  
821 193 cells; 4KO + HBEGF, 160, 253, and 235 cells; 4KO + TGF $\alpha$ , 301, 274, and 213  
822 cells; 4KO + EREG, 236, 219, and 86 cells. Data of three independent experiments are  
823 shown. p values of two-tailed t-test (4KO to others) are shown in the panel. (D) Time to  
824 the half-maximal activity after the addition of EGFR ligands. Data of three independent  
825 experiments are shown. p values of two-tailed t-test (4KO + HBEGF to others) are  
826 shown in the panel.  
827
